# Mathematical modeling and adequate environmental sampling plans are essential for the public health assessment of COVID-19 pandemics : development of a monitoring indicator for SARS-CoV-2 in wastewater

Nicolas Cluzel<sup>1\*</sup>, Marie Courbariaux<sup>1</sup>, Siyun Wang<sup>1</sup>, Laurent Moulin<sup>2</sup>, Sébastien Wurtzer<sup>2</sup>, Isabelle Bertrand<sup>3</sup>, Karine Laurent<sup>1</sup>, Patrick Monfort<sup>4</sup>, *Obépine* consortium<sup>a</sup>, Soizick Le Guyader<sup>5</sup>, Mickaël Boni<sup>6</sup>, Jean-Marie Mouchel<sup>7†</sup>, Vincent Maréchal<sup>8†</sup>, Grégory Nuel<sup>9,1†</sup>, and Yvon Maday<sup>10\*†</sup>

<sup>1</sup>*Sorbonne Université, Maison des Modélisations Ingénieries et Technologies (SUMMIT), 75005 Paris, France*

<sup>2</sup>*Eau de Paris, Département de Recherche, Développement et Qualité de l'Eau, 33 avenue Jean Jaurès, F-94200 Ivry sur Seine, France*

<sup>3</sup>*Université de Lorraine, CNRS, LCPME, F-54000, Nancy, France*

<sup>4</sup>*HydroSciences Montpellier, UMR 5151, Université de Montpellier, CNRS, IRD, F-34093 Montpellier, France*

<sup>5</sup>*Ifremer, laboratoire de Microbiologie, SG2M/LSEM, BP 21105, 44311 Nantes, France*

<sup>6</sup>*Institut de Recherche Biomédicale des Armées, Microbiology & Infectious diseases, Virology unit, 1 place Valérie André, F-91220 Brétigny-sur-Orge, France*

<sup>7</sup>*Sorbonne Université, CNRS, EPHE, UMR 7619 Metis, e-LTER Zone Atelier Seine, F-75005 Paris, France*

<sup>8</sup>*Sorbonne Université, INSERM, Centre de Recherche Saint-Antoine, F-75012, Paris, France*

<sup>9</sup>*Stochastics and Biology Group, Probability and Statistics (LPSM, CNRS 8001), Sorbonne University, Campus Pierre et Marie Curie, 4 Place Jussieu, 75005, Paris, France*

<sup>10</sup>*Sorbonne Université, CNRS, Université de Paris, Laboratoire Jacques-Louis Lions (LJLL), F-75005 Paris, France*

<sup>a</sup>*Obépine consortium includes Isabelle Bertrand, Soizick Le Guyader, Christophe Gantzer, Mickael Boni, Vincent Maréchal, Yvon Maday, Jean-Marie Mouchel, Laurent Moulin, Sébastien Wurtzer and Rémy Teyssou.*

<sup>†</sup>*These authors contributed equally.*

<sup>\*</sup>*Corresponding authors: nicolas.cluzel@sorbonne-universite.fr, yvon.maday@sorbonne-universite.fr*

## Abstract

1  
2  
3  
4  
5  
6  
7  
8  
9  
10  
11  
12  
13  
14  
15  
16  
17  
18  
19

Since many infected people experience no or few symptoms, the SARS-CoV-2 epidemic is frequently monitored through massive virus testing of the population, an approach that may be biased and may be difficult to sustain in low-income countries. Since SARS-CoV-2 RNA can be detected in stool samples, quantifying SARS-CoV-2 genome by RT-qPCR in WWTPs<sup>1</sup> has been proposed as an alternative tool to monitor virus circulation among human populations. However, measuring SARS-CoV-2 viral load in WWTPs can be affected by many experimental and environmental factors. To circumvent these limits, we propose here a novel indicator WWI<sup>2</sup> that partly reduces and corrects the noise associated with the SARS-CoV-2 genome quantification in wastewater. This method has been successfully applied in the context of Obepine, a French national network that has been quantifying SARS-CoV-2 genome in a representative sample of French WWTPs since March 5th 2020. On August 26th, 2021, 168 WWTPs were monitored twice a week in the metropolitan and overseas territories of France. We detail the process of elaboration of this indicator, show that it is strongly correlated to the incidence rate and that the optimal time lag between these two signals is only a few days, making our indicator an efficient complement or even a credible alternative to the incidence rate. This alternative approach may be especially important to evaluate SARS-CoV-2 dynamics in human populations when the testing rate is low.

---

<sup>1</sup>Wastewater treatment plants

<sup>2</sup>Wastewater indicator

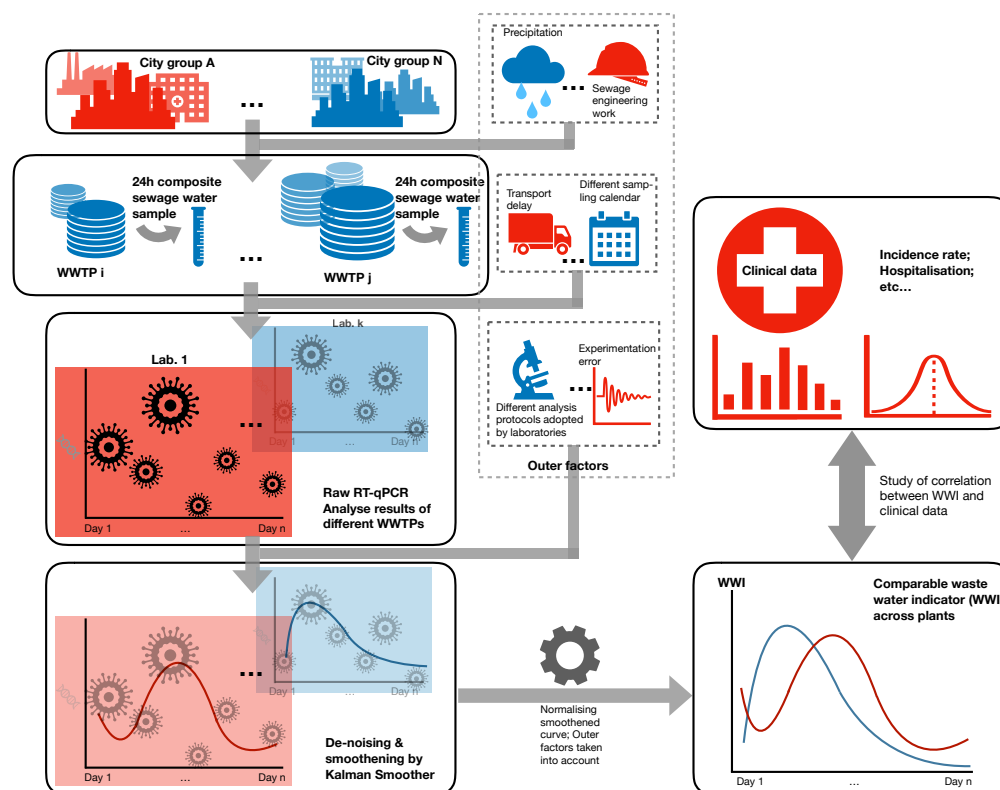

Figure 1: Graphical abstract.

20

## **Keywords**

21

Wastewater-Based Epidemiology (WBE); Severe Acute Respiratory Syndrome Coron-

22

avirus 2 (SARS-CoV-2); Coronavirus Infectious Disease 19 (COVID-19); Mathematical

23

modeling; Correlation; Sampling frequency.

## 24 **1 Introduction**

25 The SARS-CoV-2 pandemic has affected 214 million people worldwide and resulted in  
26 more than 6.6 million confirmed cases in France as of August 26th 2021. However, these  
27 figures underestimate the total number of infected people. Indeed, many asymptomatic  
28 virus carriers are not detected, except during random testing or when they are tested prior  
29 to travelling or as contact cases [13, 14]. Moreover, infected people with mild symptoms  
30 who do not seek medical assistance will not be screened either. Finally, massive individual  
31 testing may vary depending on the epidemiological situation and is economically difficult  
32 to sustain, particularly in low income countries.

33 Several studies have demonstrated the value of wastewater-based epidemiology for moni-  
34 toring SARS-CoV-2 genome shedding in WWTPs as a putative surrogate or complemen-  
35 tary approach to classical epidemiological indicators [1, 9, 11, 12]. However, SARS-CoV-2  
36 genome quantification in wastewater is subject to a number of shortcomings that must be  
37 corrected before such monitoring can be deployed on a large scale. These notably include  
38 (i) the intralaboratory variability, i.e. the repeatability error on measurements from the  
39 same sample and (ii) the inter-laboratory variability, i.e. the difference in genomic units  
40 per liter of effluent evaluated by two different laboratories for identical samples even when  
41 using similar procedures. (iii) Finally, the specificity of each wastewater network (unitary  
42 or separative), its topography, the proportion of industries and the characterization of their  
43 discharges are also criteria of variability that must be taken into account to be able to

44 compare the evolution of the epidemics at a regional scale or to deduce the trend nation-  
45 wide. The aforementioned variabilities must be corrected if the final purpose is a national  
46 monitoring network involving several laboratories, different protocols and many WWTPs.  
47 We propose herein an original design of a uniform indicator, WWI, that monitors viral  
48 load level in wastewater along time and that takes into account the above-mentioned vari-  
49 abilities. Its performance was assessed on 24 WWTPs followed by the Obepine network,  
50 a French national program that has been quantifying SARS-CoV-2 on some of the most  
51 important French WWTPs since March 3rd 2020. On August 26th 2021, 168 WWTPs  
52 were monitored twice a week. The WWI was compared to local case incidence on different  
53 EPCIs<sup>3</sup>. The robustness of this indicator to flow variations linked to various phenomena  
54 (rainfalls, civil engineering on the network imposing the detour of the watershed towards  
55 other plants, etc.) was estimated. Finally, we compared this indicator to the local incidence  
56 rate in order to estimate the correlation, the time lag between these two signals as well  
57 as the capacity of the WWI to anticipate major epidemiological changes (increased viral  
58 circulation, reduced circulation in response to governmental measures for example). This  
59 study focused on the peak of the so-called second wave that occurred in France during the  
60 fall of 2020.

---

<sup>3</sup>*Etablissement Public de Coopération Intercommunale (EPCI)*, a French administrative structure that brings together several municipalities in order to exercise some of their common duties.

## 61 **2 Materials and methods**

### 62 **2.1 Data sources**

#### 63 **2.1.1 WWI**

64 The local and regional values of WWI data are freely available for all plants treated by the  
65 Obepine network [here](#).

#### 66 **2.1.2 Incidence rate**

67 Incidence rate data are partially available in open access for 22 EPCIs and can be found  
68 [here](#). For the *Grand Reims* metropolitan area, incidence data are not available in open  
69 access. We have retrieved them by studying the different dashboards issued by the ARS  
70 Grand-Est ([example here](#)). For three additional plants (*Lagny-sur-Marne*, *Evry* and *Paris*  
71 *Seine Morée*), the data corresponding to the specific watershed of these plants were directly  
72 transmitted to us by *Santé Publique France*.

### 73 **2.2 Data analysis**

74 Statistical analyses were performed using R and Python programming languages. When  
75 not directly provided, the incidence rate was computed according to [the same formula](#)  
76 used by *Santé Publique France*, using a weekly moving average. Clinical data were then  
77 processed through [statsmodels' seasonal decomposition](#) function to extract their trends.

78 24 WWTPs were considered in the different statistical analyses, with varying sampling  
79 frequency detailed later on.

### 80 **2.3 Sampling, transport and analysis**

81 The statistical studies of this document were carried on a part of our total French wastew-  
82 ater samples collected between March 3rd 2020 and May 1st 2021. The protocol is as  
83 the following: wastewater samples were taken integratedly during a 24-hour period, were  
84 conserved at 5°C (+/- 3°C) and transported at 4°C. Quantification analyses, involving ex-  
85 traction, concentration and RT-qPCR or RT-dPCR steps [9, 10], were performed within 3  
86 days after sampling. The data associated with these samples included incoming volume  
87 at the plant inlet, ammonium concentration, conductivity and COD<sup>4</sup>. The results of the  
88 quantification (in number of genome unit per liter) and other related data were then pro-  
89 cessed by mathematical tools. RT-qPCR or RT-dPCR were performed on the E and RdRp  
90 genes, the former being routinely used to process the WWI and the latter being used for  
91 validation purpose.

---

<sup>4</sup>Chemical Oxygen Demand



## 92 **2.4 Consideration of flow fluctuations at the wastewater treat-** 93 **ment plant inlet**

94 The WWI can have different quality indices, or EDQPI,<sup>5</sup> depending on the richness of the  
95 data provided. A quality index of 1 corresponds to a viral load level without taking into  
96 account the flow inlet of a WWTP. That of 2 is improved, compared to 1, by adjusting  
97 the WWI using the incoming volume information. This helps neutralise the dilution  
98 effects due to precipitation or to watershed deviation. A level equal to 3 suggests the use  
99 of other physicochemical factors like  $\text{NH}_4^+$ , conductivity and COD in order to induce  
100 the wastewater volume related to human activities. Detailed mathematical formulas are  
101 indicated later on.

102 The problem can be expressed as follows. Let  $C_{0,t}$  be the SARS-CoV-2 concentration in the  
103 water that arrives at the inlet of the treatment plant. Then the SARS-CoV-2 concentration  
104 without dilution effect impacting the nominal operation of the network can be computed  
105 as follows:

$$C_t = \frac{C_{0,t} \times V_{0,t}}{V_t} = C_{0,t} \times \alpha_{q,t} \quad (1)$$

106 where  $V_{0,t}$  is the total volume at the inlet of the treatment plant on day  $t$  and  $V_t$  is the  
107 household wastewater volume. As these quantities need to be estimated, we approximate  
108  $\alpha_{q,t}$  by  $\hat{\alpha}_{q,t} = \hat{V}_{0,t}/\hat{V}_t$ , which is the volume normalization coefficient at time  $t$  and EDQPI

---

<sup>5</sup>Experimental Data Quality and Precision Indicator

109 q, where  $\hat{V}_{0,t}$  and  $\hat{V}_t$  are the estimations used for  $V_{0,t}$  and  $V_t$ , respectively.

- 110 • When  $V_{0,t}$  and  $V_t$  are both unknown, the EDQPI is, by design, equal to 1 and  
111 both volumes are approached by the mean daily incoming volume at the inlet of the  
112 WWTP. This volume  $V_{db}$  is extracted from the database of the French MTES<sup>6</sup> listing  
113 all the useful data for the year 2017. We then have  $\hat{\alpha}_{1,t} = V_{db}/V_{db} = 1$ .
- 114 • When  $V_{0,t}$  is measured and  $V_t$  is unknown, the EDQPI is, by design, equal to 2 and  
115 we approach  $V_t$  by  $V_{db}$ . We then have  $\hat{\alpha}_{2,t} = V_{0,t}/V_{db}$ .
- 116 • When  $V_{0,t}$  is measured and  $V_t$  is estimated from physico-chemical dilution indicators  
117 (such as  $\text{NH}_4^+$  concentration, conductivity and COD), the EDQPI is, by design,  
118 equal to 3. We then have  $\hat{\alpha}_{3,t} = V_{0,t}/\hat{V}_t$ .

119 When the EDQPI is equal to 3,  $V_t$  is estimated by the average between rectified volumes  
120 from ammonium, conductivity and COD :

$$\hat{V}_t = (1/3) \times \left[ V_{0,t} \left( \frac{[\text{NH}_4^+]_{\text{mes}}}{[\text{NH}_4^+]_{\text{dm}}} \right) + V_{0,t} \left( \frac{\sigma_{\text{mes}}}{\sigma_{\text{dm}}} \right) + V_{0,t} \left( \frac{\text{COD}_{\text{mes}}}{\text{COD}_{\text{dm}}} \right) \right]$$

121 where  $V_{0,t}$  is the total volume at the inlet of the treatment plant on day  $t$ ,  $[\text{NH}_4^+]_{\text{mes}}$  is the  
122  $\text{NH}_4^+$  concentration measured on day  $t$ ,  $[\text{NH}_4^+]_{\text{dm}}$  is the mean concentration of  $\text{NH}_4^+$   
123 measured on dry conditions the previous year,  $\sigma_{\text{mes}}$  is the electric conductivity measured  
124 on day  $t$  in  $\text{S.cm}^{-1}$ ,  $\sigma_{\text{dm}}$  is the mean electric conductivity measured on dry conditions the

---

<sup>6</sup>Ministère de la Transition écologique et solidaire

125 previous year,  $COD_{mes}$  is the chemical oxygen demand measured on day  $t$ ,  $COD_{dm}$  is the  
126 mean chemical oxygen demand measured on dry conditions the previous year.

127 This formula only applies to days when rainfall was recorded and no civil engineering of  
128 the wastewater network was involved. Indeed, these could have caused the daily incoming  
129 volume to be significantly weaker than the mean of the historical year used to assess  
130 physico-chemical concentrations in dry conditions, thus leading to an incorrect estimation  
131 of rainfall induced additional volume on rainy days.

132 In order to understand the importance of these additional data, we estimated by simulation  
133 the difference between the WWI with quality indices equal to 1 and 2. To do so, we first  
134 calibrated a parametrised statistic model under the two different settings of EDQPI 1 and  
135 2, i.e., without and with inlet volume measurement respectively, hence we got two WWI  
136 curves of corresponding EDQPI. Then for each of the two statistic models, we simulated a  
137 group of 1000 trajectories from its parameters. We finally computed the root-mean-square  
138 (RMS) deviation between the WWI of EDQPI 2 and each curve of each group of simulated  
139 trajectories. With the two sets of RMS deviations, we performed a one-factor ANOVA  
140 test to assess the impact of absence of daily incoming volume measurement of a plant,  
141 with null hypothesis being no significant difference between the 2 groups. We conducted  
142 the study on 22 sewage plants each with several samples taken on rainy days with several  
143 months of history. We ran the same simulation to compare EDQPI 2 and 3, this time on 2  
144 WWTPs for lack of sufficient physico-chemical data on the remaining sewage plants.

## 145 **2.5 De-noising and interpolation through Kalman smoothing**

146 RT-qPCR quantifications are subject to many uncertainties. Using only the calculated virus  
147 concentrations to monitor the pandemic can therefore be misleading, as a large increase in  
148 the measured concentration can be due either to a real increase in virus concentration or  
149 to a positive quantification error. This error can be caused by different factors, during the  
150 concentration, extraction or RT-qPCR phases, as well as during the integrated sampling  
151 at WWTP and its transportation. Thus, standard materials and laboratory practices have  
152 a strong influence on the RT-qPCR performance [2]. Moreover, the raw signal included  
153 in each person's stool may be altered during its stay in the sewer system and during  
154 the aforementioned analysis steps [3]. This is why these data are pre-processed through  
155 Kalman smoothing [6, 7, 8] in order to provide an estimate of the real amount of virus  
156 and to evaluate the uncertainty on this estimate. In this method, the existence of a time  
157 dependency between the actual quantities is exploited (i.e. an actual virus quantity in the  
158 wastewater on a given day provides information about the quantity that will be observed  
159 on the following days, due to the outbreak dynamics), while the successive errors in virus  
160 concentration measurements are independent from each other.

161 The concentrations to be measured are sometimes below the quantification or the detection  
162 RT-qPCR thresholds. Consequently, we face a problem of censored data. In addition,  
163 samples are typically collected twice a week, resulting in missing data on some days.  
164 Finally, outliers may bias the smoothing. A new one dimensional Kalman smoothing  
165 method [4] has been developed to adapt to these particularities for the needs of Obepine,

166 which implied a numerical discretization. We applied the developed smoother on the  
167 logarithm of the measured quantities in order to take into account the exponential character  
168 of the growth observed during the epidemic period and the heteroscedasticity observed  
169 empirically on the residuals when the method is applied directly.

170 The mathematical writing of the underlying model is as follows:

$$\begin{aligned} X_t &= \eta X_{t-1} + \delta + \kappa \varepsilon_{X,t} \\ O_t &\sim \mathcal{B}(p) \\ (Y_t^* | O_t = 0) &= X_t + \tau \varepsilon_{Y,t} \\ (Y_t^* | O_t = 1) &\sim \mathcal{U}([a, b]) \\ Y_t &= \max(Y_t^*, \ell) \\ \begin{pmatrix} \varepsilon_{X,t} \\ \varepsilon_{Y,t} \end{pmatrix} &\stackrel{i.i.d.}{\sim} \mathcal{N}(0, I), \end{aligned} \tag{2}$$

171 where:

172  $t$  is the time index (ranging from 1 to  $n$  days),  $X_t \in \mathbb{R}$  is the logarithm of the real  
173 concentration in wastewater at time  $t$ ,  $X = (X_t)_{t \in \{1, \dots, n\}}$  is the vector of log-transformed  
174 real concentrations (to be recovered) and  $Y_t \in \mathbb{R}$  is the logarithm transformation of the  
175 estimated concentration in wastewater measured by RT-qPCR at time  $t$ ,  $C_t$ , defined in  
176 Equation 1 ( $Y_t = \log(C_t)$ ).  $Y_t$  is generally only partially observed. We note  $\mathcal{T} \subset \{1, \dots, n\}$   
177 the set of  $t$  at which  $Y_t$  is observed.  $Y = (Y_t)_{t \in \mathcal{T}}$  is the vector of measurements.  $Y^*$  is an  
178 accessory latent variable corresponding to a non-censored version of  $Y$ .  $I$  is the identity

179 matrix.  $\eta \in \mathbb{R}$ ,  $\delta \in \mathbb{R}$ ,  $\kappa \in \mathbb{R}^+$  and  $\tau \in \mathbb{R}^+$  are parameters (to be estimated).  $\ell$  is the  
180 threshold below which censorship applies<sup>7</sup>.  $O_t \in \{0, 1\}$  is, for any  $t \in \mathcal{T}$ , the indicator  
181 variable of the event " $Y_t^*$  is an outlier".  $O = (O_t)_{t \in \mathcal{T}}$ .  $\mathcal{B}(p)$  stands for the Bernoulli  
182 distribution of parameter  $p$  and  $\mathcal{U}([a, b])$  for the Uniform distribution on the interval  $[a, b]$ .  
183  $p$  is a meta-parameter designating the a priori probability of being an outlier (we take  
184  $p = 2\%$  here).  $a$  and  $b$  have to be chosen, they can for example correspond to quantiles  
185 (respectively very close to 0 and very close to 1) of the empirical marginal distribution  
186 of  $Y$ . The parameters  $\eta \in \mathbb{R}$ ,  $\delta \in \mathbb{R}$ ,  $\kappa \in \mathbb{R}^+$  and  $\tau \in \mathbb{R}^+$  of maximum likelihood are  
187 estimated by numerical optimization through Nelder-Mead [5] as explained in [4]. At time  
188  $n$ , the developed smoother gives the law of  $X_t$  for  $t \in \{1, \dots, n\}$  knowing  $Y = (Y_t)_{t \in \mathcal{T}}$ ,  
189 as well as the probability for each  $Y_t$  to be an outlier. We note the produced reconstitution  
190  $\hat{X}_t = \mathbb{E}(X_t | Y_{t \in \mathcal{T}})$ .

## 191 2.6 Consideration of inter-laboratory variability

192 Several laboratories are providing sewage water SARS-CoV-2 viral load analyses to  
193 Obepine, each of them being in charge of various WWTPs. These laboratories have been  
194 selected based on their ability to carry out analyses properly using protocols that have been  
195 validated for the quantification of SARS-CoV-2 in wastewater [9, 10]. Nonetheless, com-  
196 parative ILA<sup>8</sup> have demonstrated that the estimated virus concentrations obtained on the

---

<sup>7</sup>In practice,  $\ell$  can vary from one day to another, for instance if one works on quantities that correspond to the multiplication of concentrations (with a detection limit) by a fluctuating volume. This can be taken into account within our method with no additional cost.

<sup>8</sup>Inter-laboratory assays

197 same samples by different laboratories could sometimes differ in the order of magnitude  
198 of 1 log as shown in Table 2. In order to obtain a universal indicator for normalizing data  
199 provided by different laboratories [30], we have reworked the analysis results. The level  
200 of the indicator for a specific plant is thus related to the maximum concentration recorded  
201 by its associated lab on all the plants assigned to it within the Obepine network over a  
202 specific period. We have chosen a period between June 1st 2020 and January 1st 2021,  
203 which gives a maximum corresponding to the peak of the second wave of the epidemic.  
204 We then perform the following normalization:

$$\text{WWI}_t = 150 \frac{\hat{X}_t - \log(C_m)}{\log(C_M) - \log(C_m)} \quad (3)$$

205 Where  $\text{WWI}_t$  is the WWI value at time  $t$ ,  $\hat{X}_t$  is the previously defined reconstitution,  $C_m$   
206 represents a quantification threshold of 1000 GU/L and  $C_M$  is the maximum concentration  
207 historically recorded by the reference laboratory on plants with average daily flows similar  
208 to that of the plant of interest. The normalization factor of 150 was chosen a posteriori,  
209 so as to obtain a level between 40 and 85 around the beginning of September 2020, a  
210 period which corresponds for the majority of the plants to the middle of the exponential  
211 growth phase of the second wave in France. This level corresponds to a circulation level  
212 between fairly low and average, which would have given enough time to alert on the  
213 situation of resumption of the epidemic at this time. The maximum concentration is not  
214 solely based on the laboratory's history, but more specifically on the basis of plants with

215 a similar flow to the one to be standardized. This additional selection makes it possible to  
216 harden the comparison criterion and to strengthen the ability to compare agglomerations  
217 where the epidemic situation is similar. For example, it is more likely to have 80% of  
218 the population infected at the same time in a sewage plant treating 10 inhabitants than  
219 in a sewage plant treating 10 million people. Without this partitioning, there could be a  
220 problem of underestimation of the epidemic situation in very large agglomerations in case  
221 of a critical health situation at a WWTP of much more moderate size, since the maximum  
222 concentration could never be approached by large sewage plants. We then chose to split  
223 the sewage plants in ten bins according to their average daily incoming volume, and assign  
224 a maximum concentration to each category.

225 This formula still had a major drawback in the case of laboratories joining the project  
226 later than the historical ones, typically after December 2020. To deal with this flaw,  
227 we ran several ILA which we used to assess and update a proportionality coefficient  
228 between laboratories running the same protocol. For a laboratory joining late with no  
229 historical record, we multiply its analysis results by this proportionality coefficient and  
230 use the  $C_M$  of the laboratory we have chosen as the reference for the calculation of this  
231 coefficient. Finally, under logistics and transport constraints and the workload limit of  
232 the laboratories, we designed that each laboratory receives and analyses sewage samples  
233 from plants distributed as evenly as possible over the French territory. This choice avoids  
234 the situation where one laboratory is assigned only to cities with a low incidence of the  
235 disease and another to cities with a high incidence of the disease, a situation that would



236 make difficult to compare the level of virus circulation between them. The consideration  
237 of this inter-laboratory variability allowed us to aggregate the WWI of different WWTPs  
238 and elaborate regional indicators to have a more objective insight of the epidemic situation  
239 on a larger scale. Each regional indicator represents the weighted average of the local  
240 indicators in the same area, with the weight of each plant corresponding to its average  
241 daily volume.

## 242 **3 Results**

243 We propose herein a new indicator (WWI) to convert the estimated amount of viral genomes  
244 that enter a WWTP per day in a unitless value. Diverse mathematical models (see Materials  
245 and Methods) make it possible to propose a smoothed tendency curve that faithfully reflects  
246 the epidemic situation at a WWTP.

### 247 **3.1 De-noising and interpolation through Kalman smoothing**

248 The results of this pre-processing are illustrated on an example of simulated data on Fig-  
249 ure 2 and on an example of real data from the Obepine network on Figure 3. As shown  
250 in Figure 2 on a set of simulated data, the mean signal reconstituted through this model  
251 faithfully reflects the true underlying process and shows low sensitivity to outliers. The  
252 successive reconstitutions of the underlying "true" auto-regressive process are expected  
253 to change at each new data point, since those bring additional information with regard

254 to the past. This is depicted Figure 3, with successive reconstitutions in different colors.  
255 Each intermediary reconstitution lies inside the 95% prediction interval of the final re-  
256 constitution. The difference between the final reconstitution and each of the intermediary  
257 reconstitutions is quite low, which means that there is usually not a lot of difference be-  
258 tween the results transmitted at a given date and those transmitted a week later with a pair  
259 of additional data points.

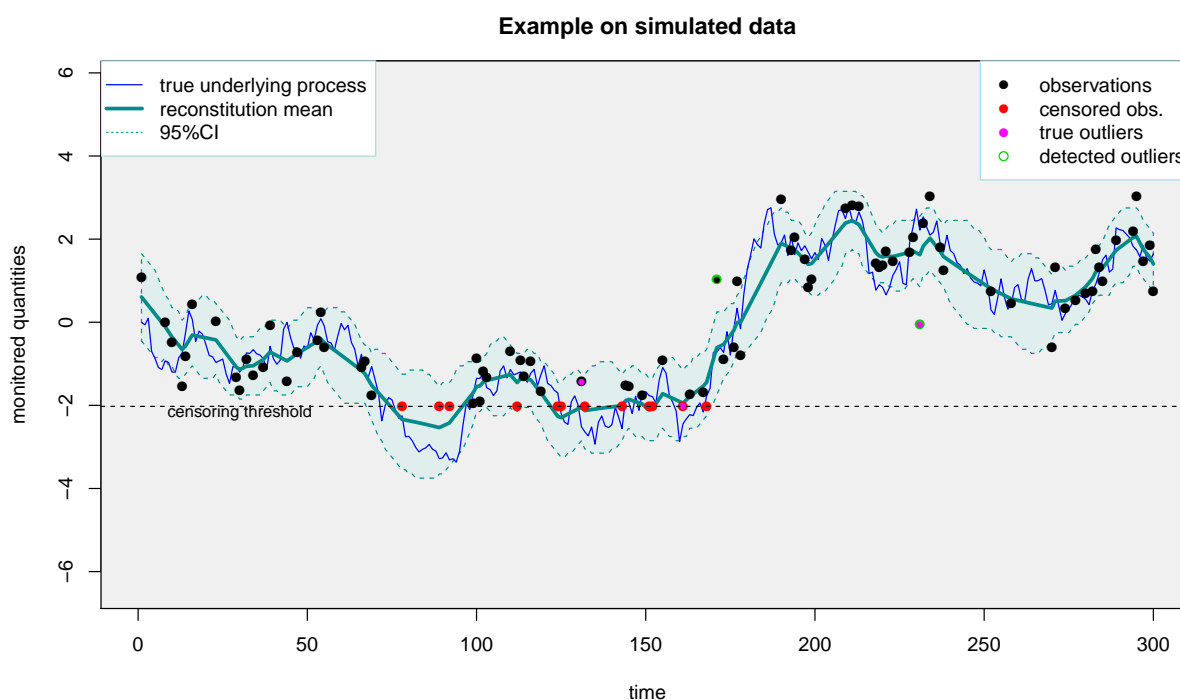

Figure 2: An example of the application of the proposed smoother (taking into account censoring and outliers) on simulated data with 16% of censored data and  $p = 2\%$  of outliers. The censoring threshold corresponds to the RT-qPCR quantification threshold. The 95% prediction interval should cover about 95% of the true underlying process (blue curve). The mean reconstitution is faithful to the true underlying process.

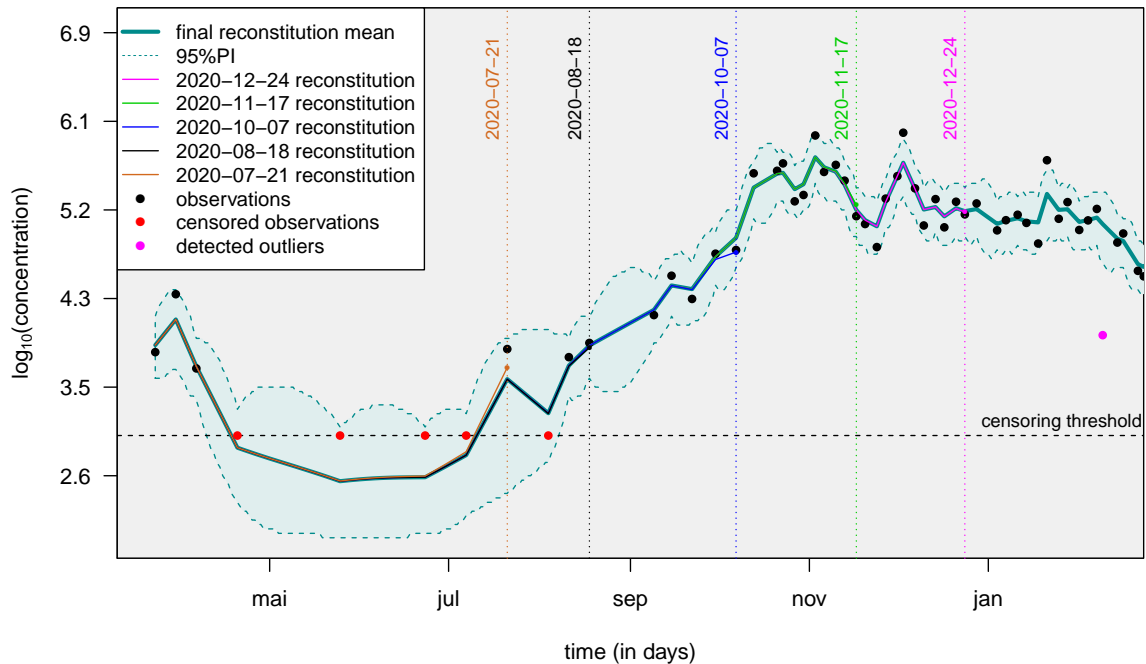

Figure 3: An example of the application of the proposed smoother (taking into account censoring and outliers) on data from a wastewater treatment plant of the Obepine network : successive predictions for the underlying process (never observed),  $X$ , 95% prediction interval and detected outliers (with an outlier proportion of  $p = 2\%$ ). The censoring threshold corresponds to the RT-qPCR quantification threshold. Each vertical dotted line corresponds to intermediary reconstitutions over the course of the project, without taking into account any additional data point past the reconstitution date. The difference between these intermediary reconstitutions and the final reconstitution gives an idea of the error made weekly prior to knowing future data points. The WWTP is the one in charge of the EPCI of *Dijon*, its associated laboratory being Lab 2, see Table 2.

## 260 **3.2 Impact of inflow variation on the WWI**

261 Each trend curve is associated with a reliability index (EDQPI). EDQPI equals 1 when  
262 the WWI is calculated with an estimated flow and 2 when the real wastewater flow is  
263 used. By using the actual inflow volume of a plant, dilution effects by one-time events  
264 such as precipitation and civil engineering on the sewage network can be counterweighted.  
265 This led us to estimate the impact of rainfall on local trend curves. Table 1 shows that the  
266 difference between WWI signals calculated with EDQPI 1 and EDQPI 2 data is statistically  
267 significant in 21 of 22 WWTPs. The only case for which the null hypothesis is not rejected  
268 is *Rouen*, which is one of the plants sampled only once a week. With an average of 180  
269 rainy days per year, it is conceivable that the test result would be different with a higher  
270 sampling frequency. Therefore, this result indicates that plant inflows needs to be informed  
271 as soon as possible to improve EDQPI and primarily during periods of prolonged rainfall  
272 or reduced flow, regardless of plant size. We also tested the differences between quality  
273 indices 2 and 3 at two plants. EDQPI is set to 3 when physico-chemical factors can be  
274 measured on samples such as  $\text{NH}_4^+$  concentration, conductivity and COD. The ANOVA  
275 results suggest that the difference is not significant this time (i.e., an EDQPI of 2 would  
276 be as effective in accounting for rainfall as an EDQPI of 3) although further investigation  
277 on a larger number and a wider variety of plants would be required.

Table 1: Significance test results for difference between EDQPI 1 and EDQPI 2.

| WWTP                       | Inhabitant equivalent capacity | Number of samples per week | p-value      |
|----------------------------|--------------------------------|----------------------------|--------------|
| Forges-les-eaux            | 16 000                         | 1                          | <0.0001      |
| Fécamp                     | 45 000                         | 1                          | <0.0001      |
| Saint-Denis lès Sens       | 64 000                         | 2                          | <0.0001      |
| Auxerre-Appoigny           | 83 000                         | 2                          | <0.0001      |
| Nantes-2-Petite Californie | 180 000                        | 2                          | <0.0001      |
| Evry                       | 220 000                        | 2                          | <0.0001      |
| Lyon-La Feysine            | 300 000                        | 2                          | <0.0001      |
| Le Havre                   | 320 000                        | 1                          | <0.0001      |
| Lagny-sur-Marne            | 350 000                        | 2                          | 0.0017       |
| Dijon                      | 400 000                        | 2                          | <0.0001      |
| Lille Grimonpont           | 420 000                        | 2                          | <0.0001      |
| Reims                      | 470 000                        | 7                          | <0.0001      |
| Nancy-Maxeville            | 500 000                        | 2                          | <0.0001      |
| <b>Rouen</b>               | 550 000                        | 1                          | <b>0.488</b> |
| Paris Marne Aval           | 550 000                        | 2                          | <0.0001      |
| Nantes-1-Tougas            | 600 000                        | 2                          | <0.0001      |
| Nice-Haliotis              | 620 000                        | 2                          | <0.0001      |
| Lyon-Pierre Bénite         | 630 000                        | 2                          | <0.0001      |
| Toulouse-Ginestous         | 950 000                        | 2                          | 0.034        |
| Lyon-Saint-Fons            | 980 000                        | 2                          | <0.0001      |
| Strasbourg                 | 1 000 000                      | 2                          | 0.0012       |
| Paris Seine Amont          | 3 600 000                      | 2                          | <0.0001      |

### 3.3 Consideration of inter-laboratory variability

278

279

We take a critical look at the normalization technique we used to account for the inter-

280

laboratory variability. As no WWTP had been analyzed by at least two different labora-

281

tories over the course of the project, we simulated an hypothetical behavior of a network

282

with only one plant analyzed by the 9 Obepine laboratories. We chose one laboratory as a

283 reference (Lab 1), and simulated quantification results varying from this reference, using  
284 May 2021 ILA results summarized in Table 2. To do so, we simulated a synthetic signal  
285 and assigned it to Lab 1. Then, using Table 2, we synthesized 8 others signals using scaling  
286 factors drawn from normal distributions whose parameters were estimated using May 2021  
287 ILA results. For each sampling date and each laboratory, a credible scaling factor was  
288 drawn from these normal distributions. We compared three normalization techniques. CM  
289 refers to a single common maximum concentration among all laboratories. LSM refers  
290 to the modelisation we used, with a laboratory-specific maximum concentration. CMILA  
291 refers to a single common maximum concentration after scaling all the laboratories results  
292 to a reference laboratory using ILA results. Figure 4 shows that our normalization tech-  
293 nique significantly reduces the inter-laboratory variability for laboratories 4 to 8. Results  
294 are not significantly improved for the remaining 3 laboratories because such a normaliza-  
295 tion is not needed, as their scaling factors are close to 1 and their inter-samples replicability  
296 is quite good. Results can still be significantly improved, especially for lower values of  
297 WWI, once ILA are carried out.

Table 2: May 2021 ILA results as scaling factors between the 9 Obepine laboratories, in relation to one laboratory taken as reference (Lab 1).

|                     | Lab 2 | Lab 3 | Lab 4 | Lab 5 | Lab 6 | Lab 7 | Lab 8 | Lab 9 |
|---------------------|-------|-------|-------|-------|-------|-------|-------|-------|
| Scaling factor mean | 0.95  | 1.20  | 1.96  | 3.96  | 10.64 | 0.40  | 6.50  | 1.12  |
| Scaling factor std  | 0.31  | 0.34  | 0.54  | 0.74  | 9.00  | 0.077 | 2.62  | 0.43  |

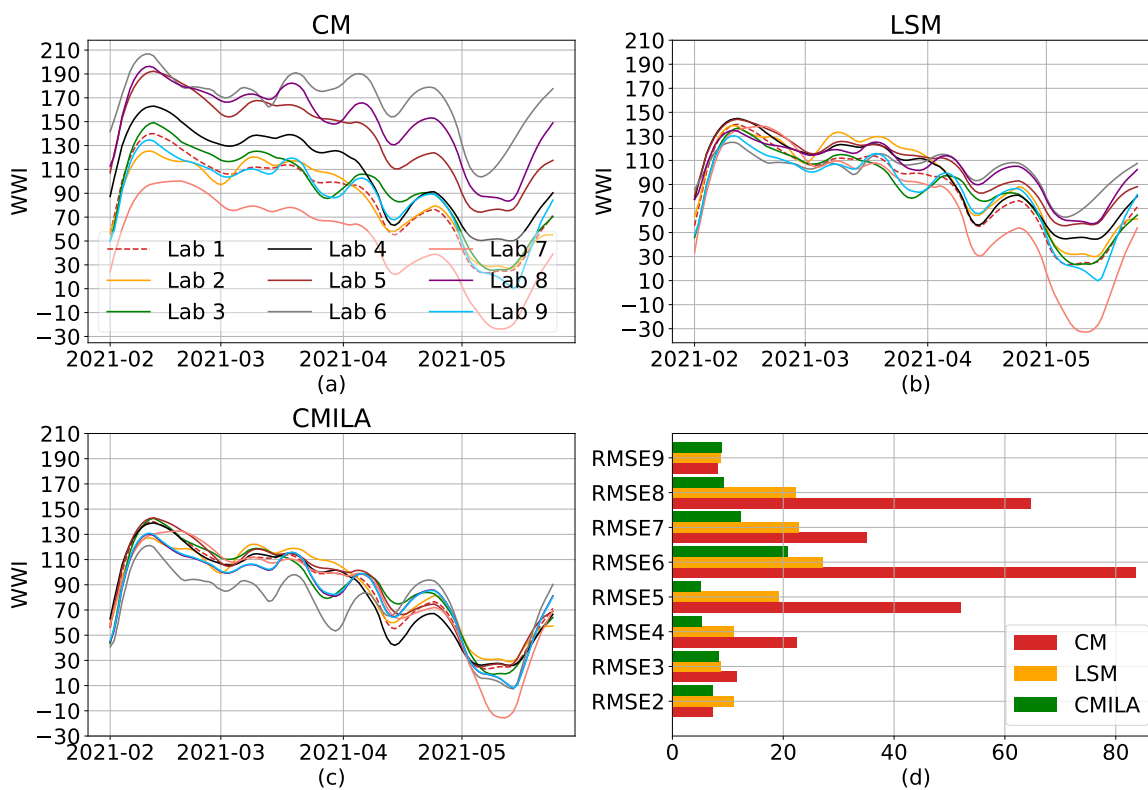

Figure 4: Simulation of different inter-laboratory variabilities and normalization techniques. We simulate the simple case of a single plant in a network analyzed by the 9 Obépine laboratories. (a) shows the results if the WWI normalization formula is applied with a  $C_M$  common to all laboratories. Results show a clear disparity between laboratories and a strong attenuation towards laboratories with lower quantifications results than laboratory 6. (b) shows the correction brought by using a  $C_M$  specific to each laboratory. Results are significantly improved for laboratories 4 to 8. The difference is not significant for the remaining 3 laboratories which all have a scaling factor close to 1 and a good inter-samples replicability. (c) shows the correction brought by using ILA results and estimating a scaling factor between each laboratory and Lab 1. As shown in (d), CMILA still is the overall best normalization technique. CM, LSM and CMILA respectively accounts for a common maximum, a laboratory-specific maximum and a common maximum after scaling following ILA. RMSE are calculated using the Lab 1 as reference.

### 3.4 Correlation and lag between the WWI and the incidence rate

We now focus on several EPCIs whose incidence rate is available at a local scale, within which the sewage network connects to one single WWTP, to limit possible omission biases related to the outbreak of the epidemic in neighborhoods not connected to the monitored plant, which may produce a phase shift. To determine the period over which to calculate the correlation between the two signals (the WWI and the incidence rate), we consider the following. The results of the virological tests are reported by municipality of residence and not municipality of testing, while the wastewater signal is localized and unchangeable. Moreover, the WWI is expected to capture contributions from asymptomatic and mildly symptomatic patients, which we suspect not to be negligible during the June-August 2020 period, whereas the incidence rate only reports diagnosed people. As we want to calculate the correlation between the two signals over a period where they are supposed to be similar and thus where the WWI is supposed to mainly capture a majority of people also likely to be diagnosed, we decided to focus on the period corresponding to the second wave of the epidemic in France. To avoid being biased by the movements of individuals during the 2020 summer vacations, we consider the start date of September the 1st, 2020, from which the majority of holidaymakers returned to their residence city. We consider that the last point of the interval of interest is the date from which the signal undergoes a new growth phase following the decay of the second peak of the epidemic. This date can thus



318 vary depending on the different local dynamics of the epidemic. We then drag the subpart  
319 of the incidence rate curve over a +/- 30-day window until we find the time lag that yields  
320 the best correlation with the WWI. We use cross-correlation as a measure of similarity  
321 between the two signals. The cross-correlation calculation is performed between the WWI  
322 and the log transformation of the incidence rate. Since correlation is sensitive to outliers  
323 especially when sample size is small, we subsampled the incidence signal using 50% of  
324 the available data so as to avoid certain special patterns resulting in an unnaturally high  
325 correlation. The time lag resulting the highest positive correlation is recorded. A positive  
326 lag value indicates that the WWI is ahead of the studied epidemic signal. A negative lag  
327 value indicates that the WWI is lagging behind it. We selected several EPCIs to study the  
328 results on cities of different sizes and various regions, using the results of three different  
329 laboratories. Finally, we briefly discuss the case of two regional WWIs.

330 Figure 5 shows an example of simulation results on the *Lagny-sur-Marne* WWTP. There  
331 is a strong correlation ( $> 0.92$ ) between the WWI and the incidence rate during the second  
332 wave for this WWTP. Moreover, the optimal phase shift between the two signals is quite  
333 low (2 days), meaning the WWI was a great surrogate to the incidence rate at that time.

334 Figure 6 and Table 3 show some interplant variance on the time lag and the correlation  
335 between WWI and incidence rate. Such a variance in time lag between WWTPs has  
336 already been reported [20]. The intra-experimental variance is significantly higher for the  
337 WWTP of *Nancy*, whose average correlation with the incidence rate is not as strong as  
338 that of the other WWTPs. As the samples were taken with a one shot sampling and not

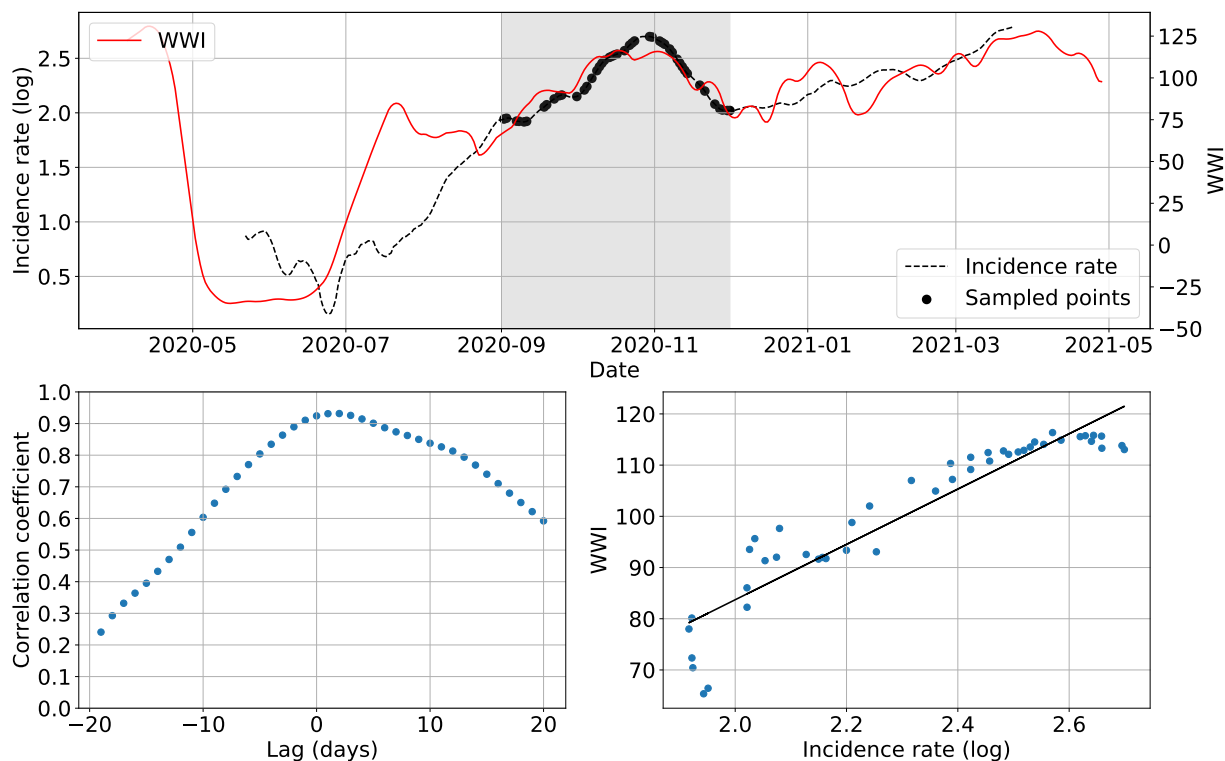

Figure 5: Simulation example on the *Lagny-sur-Marne* WWTP. The top plot shows WWI and incidence rate curves as well as the sample points selected for that simulation (the shadowy area corresponds to the period of interest). The bottom left plot displays the computed correlation values for lag values varying between -20 and 20 days. A positive lag means that the WWI is ahead of the incidence rate. A negative lag means that the WWI is lagging behind the incidence rate. The bottom right plot displays a scatter plot of WWI vs incidence rate at best time lag (2 days, with a correlation coefficient of 0.932), as well as the linear regression fitted on the data.

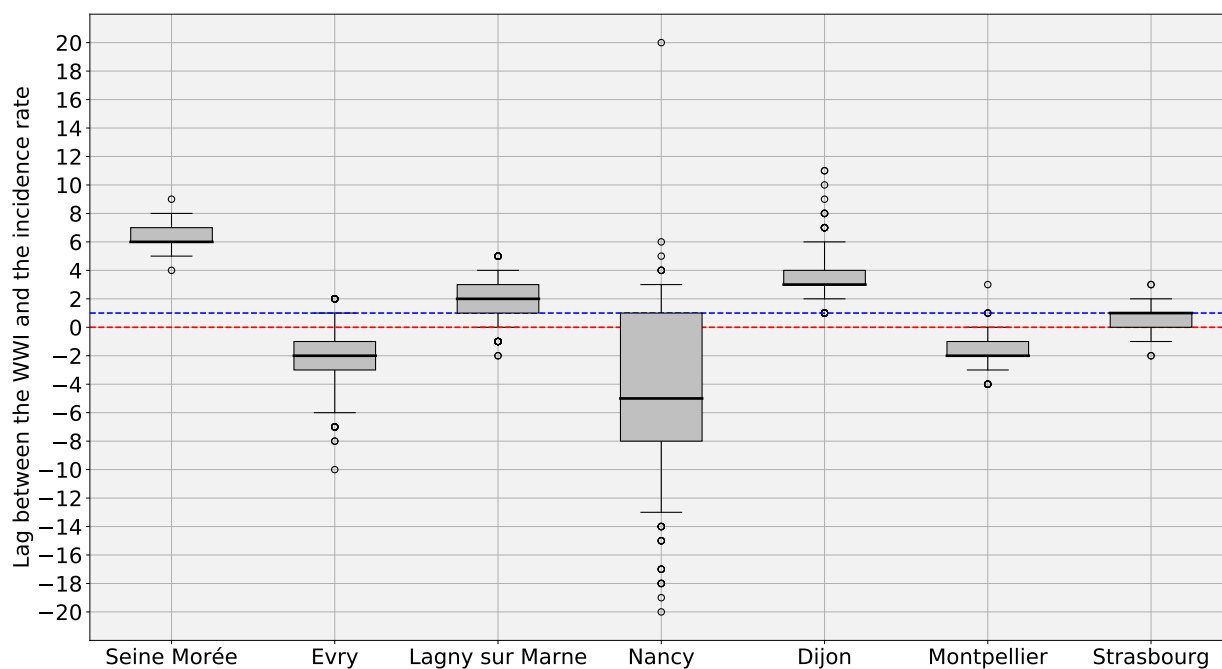

Figure 6: WWI and incidence rate lag estimates in days ( $n = 1000$  simulations with random sampling of 50% of incidence rate curve). The Red dotted line indicates the zero offset level. The Blue dotted line is the median level over the 7 medians. The intra-experimental variance is significantly higher for the WWTP of *Nancy*, whose samples were not integrated before October 20th 2020, leading to a more pronounced noise on the first half of the wave.

339 integrated over 24 hours until October 20th, 2020 at this plant, it cannot be excluded that  
340 the correlation is weaker due to a more pronounced noise on the samples taken before this  
341 date [12]. As previously argued, we did not consider the time period between July and  
342 August 2020, one of the reasons is that we may have detected an earlier emergence of  
343 the pandemic than the incidence rate, as witnessed before by [22]. An explanation could  
344 be that, by the time, it was mainly younger populations that were affected, among which  
345 less symptomatic cases were reported. It is then sensible that the proportion of tested  
346 positive to total infected was rather low at that time. It is thus conceivable that the signal  
347 captured by the WWI differs more significantly from the incidence rate during that period  
348 because the two indicators monitored different populations by that time than at the second  
349 peak of the epidemic. Such a change in the demographic of the pandemic has already been  
350 reported in the state of Massachusetts [19] and is shown in Figure 7. The correlation is still  
351 good between the two compared signals ( $>0.85$  for every WWTP except Nancy), which  
352 is consistent with the results of [1, 9, 12, 25, 26, 27, 28]. An inter-WWTP variance in  
353 median time lag remains, as seen in Table 3, and is going to be discussed in section 3.5. Yet  
354 imperfect as they do not sample a population as large as the one surveyed by the incidence  
355 rate because we could only monitor a fraction of the cities of the different French regions,  
356 regional wastewater indicators still show a good correlation (minimum correlation of 0.8)  
357 with their clinical counterparts, as shown in Figure 8 and Table 4. Moreover, the regional  
358 WWI is peaking ahead of the regional hospitalizations for both studied regions during the  
359 second wave, which is consistent with the findings of [23, 24]. This illustrates the good

360 aggregation capability of the WWI thanks to the normalization techniques we used, and  
 361 our ability to follow the epidemic situation at a larger scale, despite monitoring at best less  
 362 than 60% of a region's inhabitants, as shown in Table 4.

Table 3: WWI and incidence rate lag estimates during the second wave of Fall 2020. Best correlation is the median of the best correlation over 1000 experiments. *Montpellier* was sampled once a week at that time. \**Strasbourg, Nancy, Evry* and *Dijon* were sampled once a week until mid October 2020, then twice a week. *Lagny* and *Seine-Morée* were sampled twice a week.

|                           | Nancy | Evry  | Montpellier | Dijon | Lagny | Seine-Morée | Strasbourg |
|---------------------------|-------|-------|-------------|-------|-------|-------------|------------|
| Lag (days)                | -5    | -2    | -2          | 3     | 2     | 6           | 1          |
| Sampling frequency (days) | 2*    | 2*    | 1           | 2*    | 2     | 2           | 2*         |
| Best correlation          | 0.758 | 0.857 | 0.877       | 0.893 | 0.923 | 0.943       | 0.948      |

Table 4: Regional WWI correlation and lag estimates with incidence rate and hospitalizations during the second wave of Fall 2020. Best correlation is the median of the best correlation over 1000 experiments. IR means the WWI is compared with the incidence rate, H means the WWI is compared with the daily new hospitalizations in the corresponding region. The estimated surveyed population was calculated by considering the volume  $V_{db}$  of each plant and a daily consumption of 200L per inhabitant.

|                               | Île-de-France - IR | Île-de-France - H | Grand-Est - IR | Grand-Est - H |
|-------------------------------|--------------------|-------------------|----------------|---------------|
| Lag (days)                    | -2                 | 7                 | 2              | 8             |
| Estimated surveyed population | 33.1%              | 33.1%             | 58.6%          | 58.6%         |
| Best correlation              | 0.806              | 0.855             | 0.941          | 0.966         |

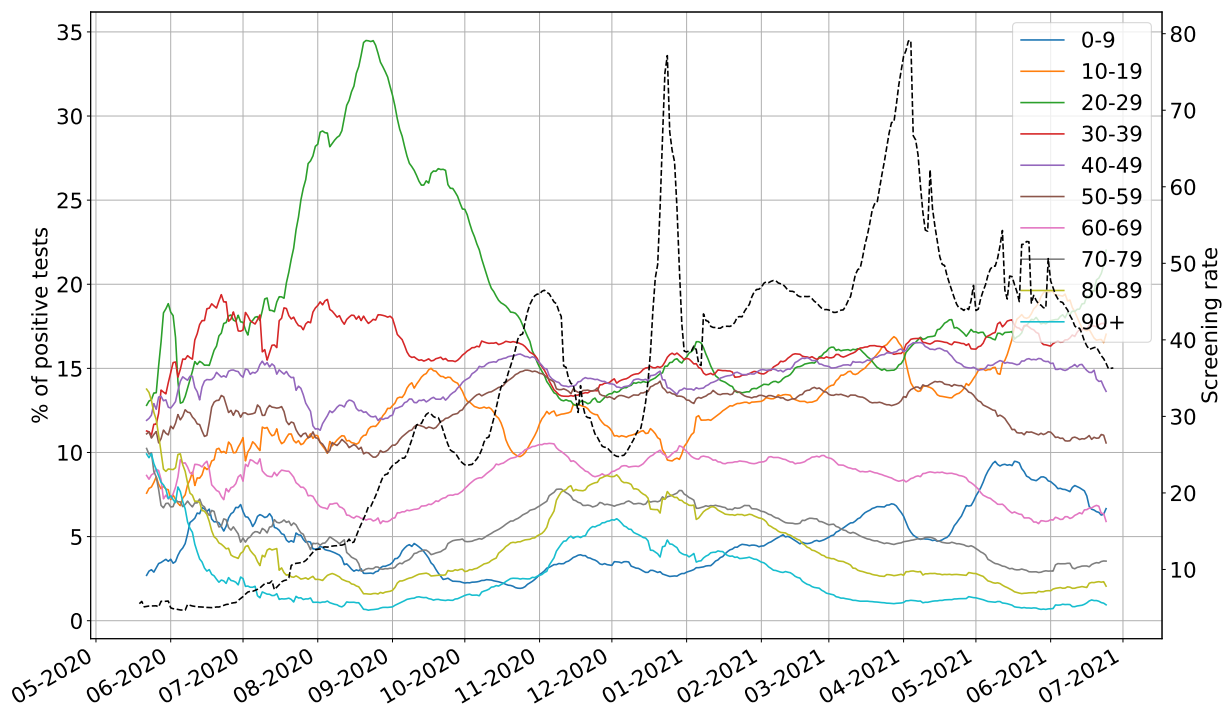

Figure 7: Evolution of the ratio of positive tests among each age bracket in France (straight lines) and of the screening rate (black dotted line). The screening rate corresponds to the number of test performed in France per 100,000 inhabitants. 20-29 years old bracket peaked during Summer 2020 and accounted for around 35% of the positive tests at its peak on August 21st 2020. Overall, the ratio increased from early June 2020 to late August 2020 among this age bracket. Conversely, the ratios among 40 years old and older categories were dwindling from July or even earlier for some of them. Infections were thus predominant among young people during Summer 2020 and less likely to be detected through conventional testing as the screening rate was about 3 times less important than at the peak of the second wave.

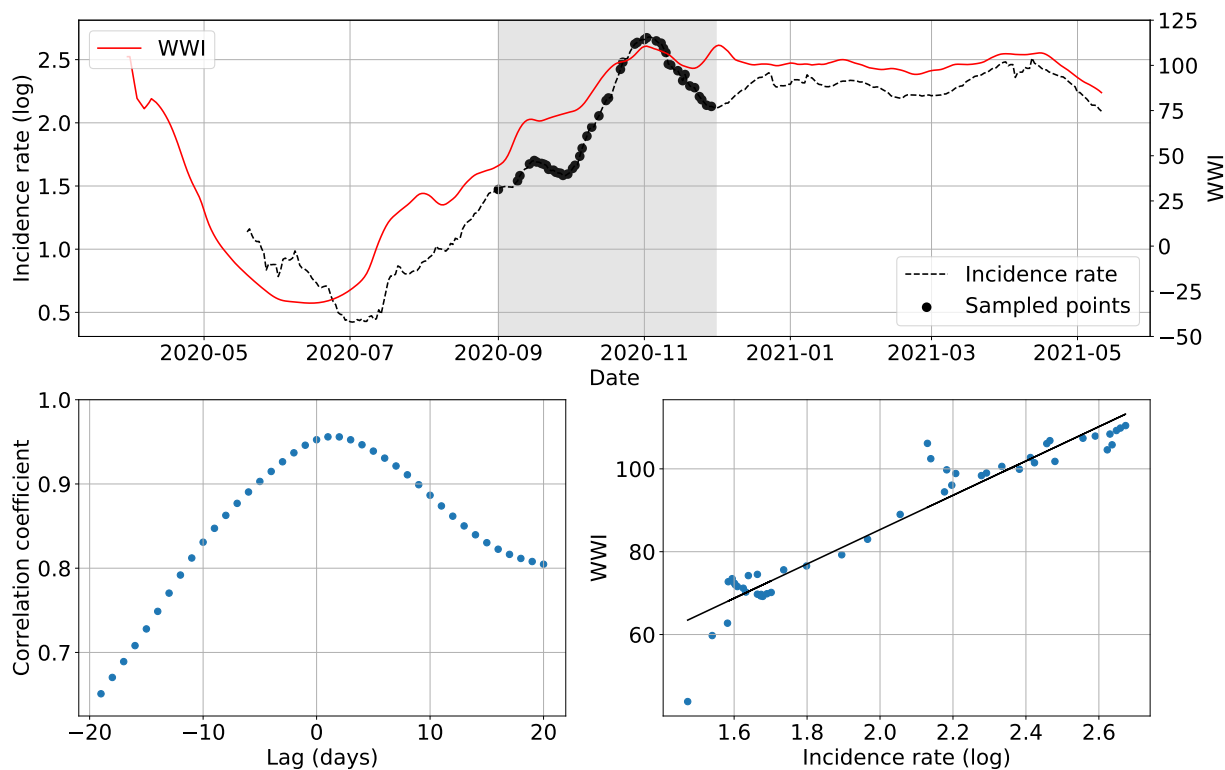

Figure 8: Simulation example for the Grand-Est region and the incidence rate. The top plot shows WWI and incidence rate curves as well as the sample points selected for that simulation (the shadowy area corresponds to the period of interest). The bottom left plot displays the computed correlation values for lag values varying between -20 and 20 days. A positive lag means that the WWI is ahead of the incidence rate. A negative lag means that the WWI is lagging behind the incidence rate. The bottom right plot displays a scatter plot of WWI vs incidence rate at best time lag (1 day, with a correlation coefficient of 0.956), as well as the linear regression fitted on the data.

### 363 **3.5 Impact of the sampling frequency**

364 The monitored WWTPs are collected twice a week with integrated 24h sampling, except  
365 for a few rare exceptions including the *Reims* WWTP, which is analyzed on average every  
366 day of the week, with rare exceptions. Since the *Reims* WWTP has been monitored for  
367 more than a year, it can be used to study the impact of the sampling frequency on the  
368 WWI signal. To do so, we compared its WWI signal with all available samples to WWI  
369 signals that would have been obtained from different sampling combinations comprised  
370 between 1 and 6 days per week. For the two-day tests, we only considered the case where  
371 the selected days were not consecutive. For the three-day simulation, we also prevented  
372 combinations where two days were consecutive. For the four-day scenario, we considered  
373 all possibilities except those where at least three days were consecutive. We then used two  
374 metrics to quantify this impact: RMSE between each WWI signal and cover rate between  
375 their respective 95% prediction intervals. We define the cover rate CR with the following  
376 formula :

$$\text{CR} = \frac{2 \times S_{\text{common}}}{S_1 + S_2}$$

377 where  $S_{\text{common}}$  is the intersection area between the two prediction intervals (see Figure 10),  
378  $S_1$  and  $S_2$  being the areas of the prediction intervals of the considered models. We chose this  
379 formula and not only the  $S_{\text{common}}$  to account for the case where wider prediction intervals,



380 implying greater uncertainties, would lead to greater cover rates than better models with  
381 narrower intervals because it would have a greater intersection with the whole prediction  
382 interval of the default model.

383 Since the medians of the lags between the WWI and the incidence rate were quite different  
384 between WWTPs as shown in Figure 6, we wanted to evaluate the impact of the sampling  
385 days on this offset. To do so, we also used the data from the *Reims* WWTP. This allowed  
386 us to compare different versions of the WWI and to compare them with the incidence  
387 rate. We tested all combinations of two sampling days per week, excluding the possibility  
388 that sampling occurs on two consecutive days (a situation that can sometimes occur for  
389 logistical reasons but should remain exceptional). This plant was not included in the  
390 second wave offset study because wastewater analysis results were impacted by logistical  
391 problems at that moment. To assess the influence of sampling, we tested the time period  
392 around the January 2021 epidemic growth (between November 30th 2020 and January  
393 22nd 2021), which is visible on both the incidence rate curve and the WWI curve. As the  
394 incidence data from *Reims* were not available for weekends and holidays, we revised the  
395 sampling rate upwards for the tests in this city as the number of points was lower (60% of  
396 the points compared to 50% for the studies focused on the second wave).

397 We can see on Figure 9 that both metrics show a clear improvement between once and  
398 twice a week sampling (RMSE is cut by more than half and median cover rate improves by  
399 16%). While both RMSE and cover rate gains seem to be weaker than the ones we had from  
400 once to twice a week, it is important to notice that their variance has also been significantly

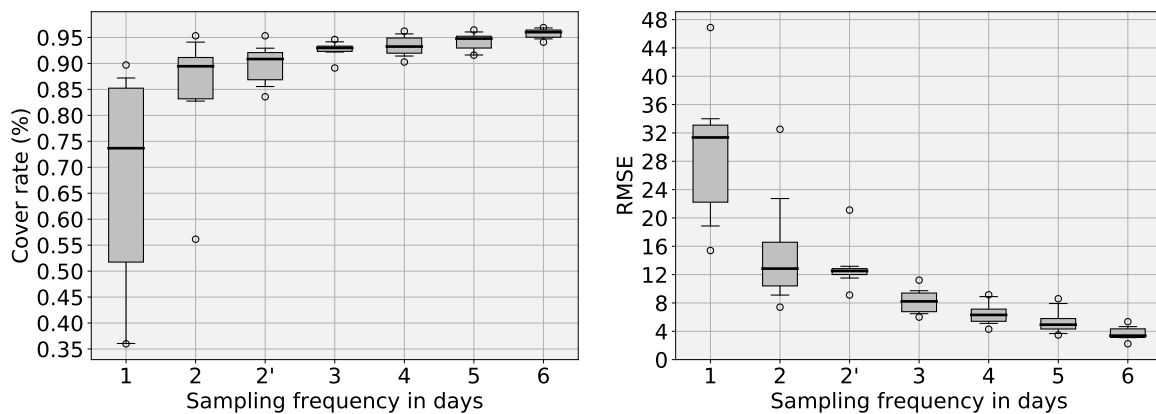

Figure 9: Quantitative results of the sampling frequency analysis performed over the *Reims* WWTP. The left plot displays the evolution of the cover rate between 95% prediction intervals obtained with a reduced number of sampling days and the full signal. The cover rate represents the common surface of 95% prediction intervals between the default model and the studied subsampled model. The right plot shows the RMSE between the WWI. The x-axis represents the sampling frequency. 2' frequency is a particular case of biweekly sampling where at least 2 days separate each sampling day (e.g. Monday can only be paired with Thursday or Friday). 3 days sampling seems to be the best cost-performance tradeoff. 2' solution still brings an improvement to simple 2 days sampling if 3 days sampling cannot be achieved.

401 reduced when upgrading from twice to three times a week. Achieved gains from three  
402 days and a more important sampling frequency does not seem as much interesting, for  
403 both metrics.

404 Qualitative wise, we can see on Figure 10 that going from 6 to 3 sampling days does not  
405 bring any significant difference to the WWI signal. Yet, short term interpretations can  
406 still be affected on specific periods as, the less sampling days available, the more biased  
407 towards outliers the WWI can become. Such a situation can be seen on subfigure (d): while  
408 the default signal is continuously dwindling from early to mid-January, the subsampled  
409 signal is actually shortly going down then increasing towards a plateau. Even though the

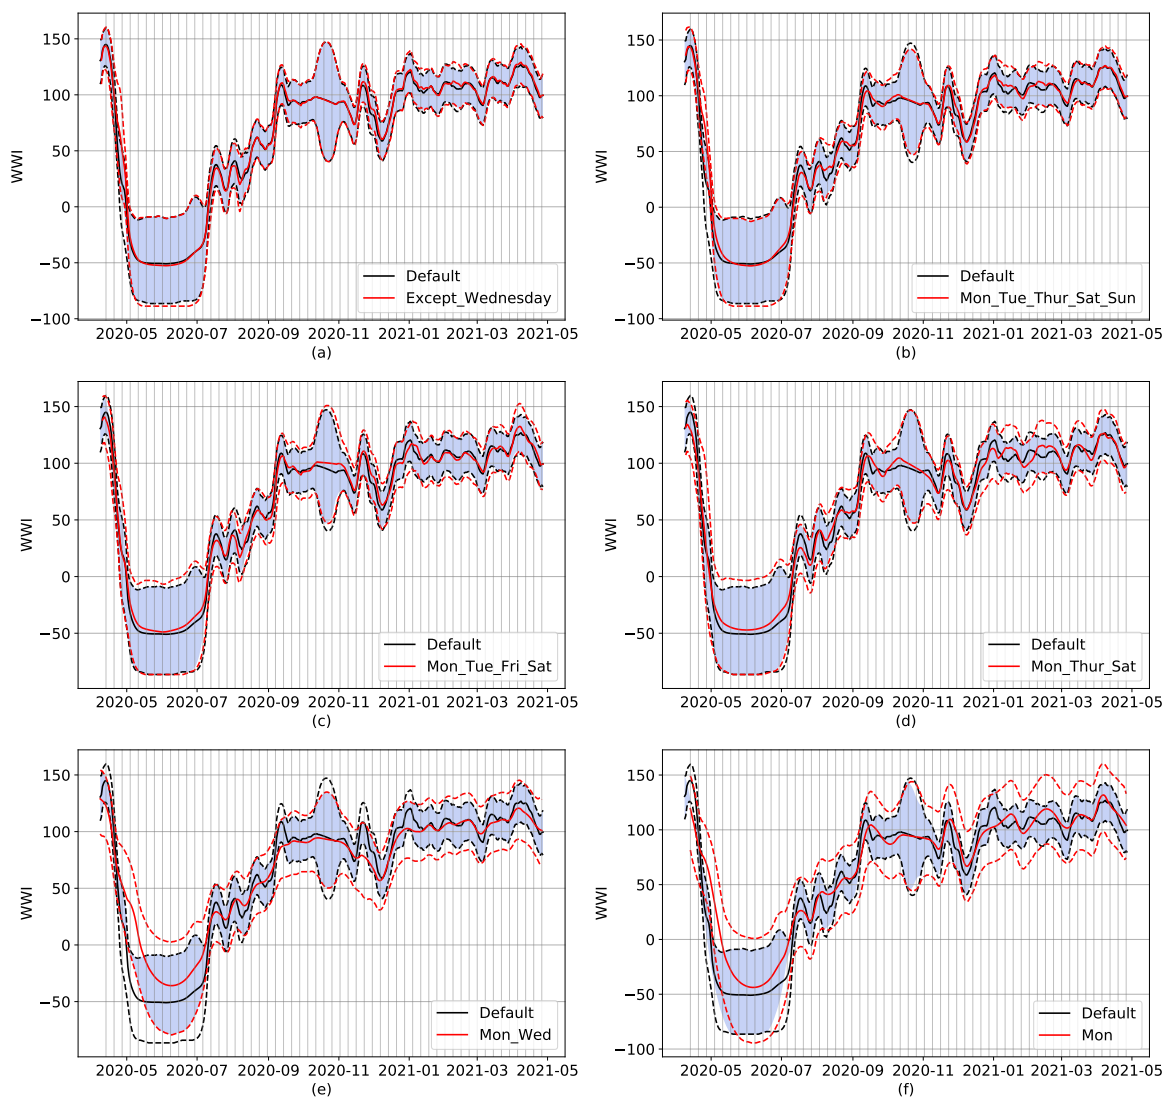

Figure 10: Examples of subsampling on the *Reims* WWTP, ranging from six days (top left) to one day per week (bottom right). Dotted lines represent the respective 95% prediction intervals for default (black) and subsampled (red) models. The default model uses all the available data from the *Reims* WWTP (usually 7 samples a week). Continuous lines show the WWI of both models. The blue-colored surface represents the intersection of both prediction intervals. The vertical grid corresponds to Mondays. On figure (d), short term trend of red and black signals differs early January. On subfigure (e), local peaks on early September and early December are missing on the subsampled signal. Subsampling can also induce couple days of time lags in peaks, as shown in figure (f) with both same local peaks.

410 general dynamics of the signal are still captured through once and twice a week sampling,  
411 local variations can be missed. On subfigure (e), local peaks on early September and late  
412 November are missing on the subsampled signal. They are captured through once a week  
413 sampling, but with a slight offset.

414 Figure 11 shows that a similar variance as the inter-WWTP variance shown in Figure 6  
415 can be observed by changing the sampling days of the same sewage plant (the experiments  
416 were conducted on the *Reims* WWTP). Indeed, the difference in variance between the two  
417 sets of median time lags from the 7 WWTPs of Figure 6 and the 14 two-days combinations  
418 of Figure 11 is not statistically significant (p-value=0.78). The difference in time lags  
419 observed in Figure 6 between the 7 WWTPs studied could thus be notably explained by  
420 the approximation on the WWI signal because of subsampling.

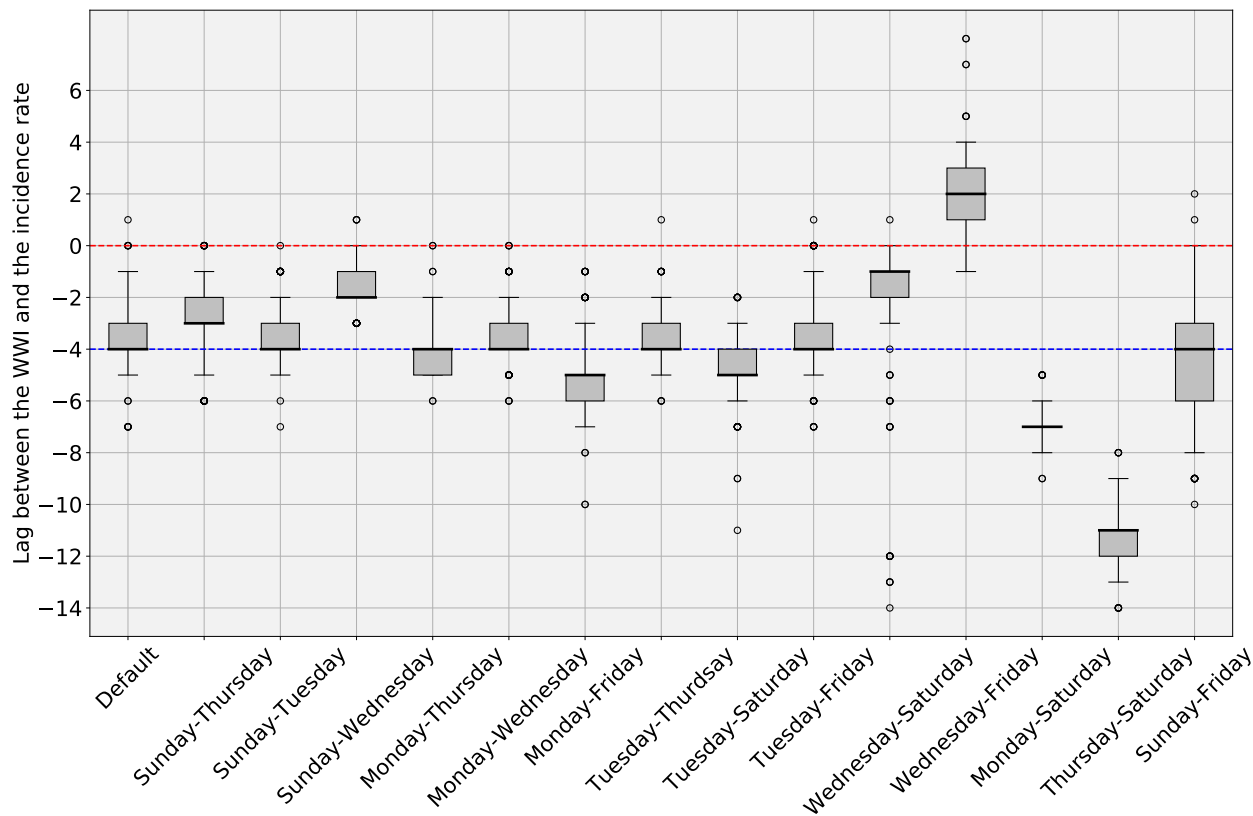

Figure 11: WWI and incidence rate lag estimates in days with varying sample days for the treatment plant of *Reims* ( $n = 1000$  simulations with random sampling of 60% of incidence rate curve). Default corresponds to the WWI as it is routinely processed with every single data point available. Other possibilities are obtained through resampling twice a week on specific weekdays. The Red dotted line indicates the zero offset level. The Blue dotted line is the median level over the 14 medians. As the difference in variance between the set of median time lags from the 7 WWTPs of Figure 6 and the set of median time lags from the 14 two-days combinations displayed here is not statistically significant, subsampling could be one of the factors explaining the variability in optimal time lags between WWTPs shown in Figure 6.

### 3.6 Assessment of the comparative ability of the WWI

The WWI was designed to make comparable the analysis results provided by different laboratories, each with its own analysis bias. These plants may treat very different volumes of water with varying proportions of water from households, rainfall runoff, and other sources. In order to verify that this objective of uniformity is indeed achieved, we studied further the relationship between the WWI and a so-called reference indicator of the virus circulation derived from the incidence rate, which is considered as having a good comparative ability. If the objective of uniformity is reached, we expect this relationship to be the same whichever plant is considered.

To test the achievement of the uniformity objective, we consider the following 3 nested linear mixed effects models of increasing complexity:

- The first one is the simple linear model (Model 0) which corresponds to the case when the homogeneity objective is fully fulfilled:

$$\text{WWI}_{i,t} = \iota + \gamma Z_{i,t} + \epsilon_{i,t}, \quad \epsilon_{i,t} \stackrel{i.i.d.}{\sim} \mathcal{N}(0, s^2), \quad (\text{Model 0})$$

where  $\text{WWI}_{i,t}$  is the WWI value at time  $t$  for plant  $i$ ,  $Z_{i,t}$  is the corresponding reference indicator,  $\iota \in \mathbb{R}$ ,  $\gamma \in \mathbb{R}$  (the intercept and the slope in the linear relation) and  $s \in \mathbb{R}^+$  (the level of uncertainty of the relation) are parameters to be estimated.

- The second one is a mixed effect model (Model 1) with a random effect on the

439 intercept. It corresponds to the case when the homogeneity target is fulfilled with  
 440 regard to the multiplicative relation with the reference indicator, but not with regard  
 441 to the additive relation with the reference indicator:

$$\text{WWI}_{i,t} = \iota + K_i + \gamma Z_{i,t} + \epsilon_{i,t}, \quad \epsilon_{i,t} \stackrel{i.i.d.}{\sim} \mathcal{N}(0, s^2) \quad (\text{Model 1})$$

$$K_i \stackrel{i.i.d.}{\sim} \mathcal{N}(0, s_K^2),$$

442 where, in addition to the terms of Model 0,  $K_i$  is the intercept random effect for  
 443 plant  $i$  and  $s_K \in \mathbb{R}^+$  is a parameter to be estimated.

444 • The third and last one is a mixed effects model with 2 random effects (Model 2). It  
 445 corresponds to the case when the homogeneity target is not fulfilled with regard to  
 446 the multiplicative relation nor with regard to the additive relation with the reference  
 447 indicator:

$$\text{WWI}_{i,t} = \iota + K_i + (\gamma + G_i)Z_{i,t} + \epsilon_{i,t}, \quad \epsilon_{i,t} \stackrel{i.i.d.}{\sim} \mathcal{N}(0, s^2) \quad (\text{Model 2})$$

$$\begin{pmatrix} K_i \\ G_i \end{pmatrix} \stackrel{i.i.d.}{\sim} \mathcal{N} \left( 0, \begin{pmatrix} s_K^2 & s_{KG} \\ s_{KG} & s_G^2 \end{pmatrix} \right),$$

448 where, in addition to the terms of Model 1,  $s_{KG} \in \mathbb{R}$  and  $s_G \in \mathbb{R}^+$  are parameters

449 to be estimated and  $G_i$  is the slope random effect of plant  $i$ .

450 In the study that follows, the reference indicator,  $Z$ , is the logarithm of the incidence rate  
451 of the geographic area connected to the treatment plant considered at the same date. In  
452 effect, this indicator is considered as a good indicator by the sanitary authorities. The  
453 logarithmic transformation makes it possible to find a linear growth like the one obtained  
454 for the WWI and thus a comparable curve shape. This reference indicator can be assumed  
455 to be universal when it is not affected by public health policies or population movements,  
456 for example. We thus restrict the study to the so-called second wave of the epidemic in  
457 France excluding main holiday periods, from September the 1<sup>st</sup>, 2020 to December the  
458 15<sup>th</sup>, 2020.

459 We estimated a time lag between the two indicators the same way we did in section 3.4, and  
460 temporally realigned them accordingly. The focus is on all WWTPs which were analyzed  
461 at that time and for which the incidence rate is available for the related municipalities,  
462 even though the surveyed populations are not always exactly the same, but considered  
463 close enough. To learn the model parameters, we only use the points for which we have  
464 measurements at the WWTPs. This notably permits to measure the gain in comparative  
465 ability along the successive stages of the WWI construction.

466 Figure 14 shows the relation between the WWI and the incidence rate in log scale from  
467 the full mixed effects model (Model 2). Among the WWTPs considered for the training  
468 of the models, one has a stronger negative impact on the comparative ability of the WWI  
469 than the others, *Montpellier-Maera*, with an intercept significantly higher than the ones



470 of the other WWTPs, resulting in a potential positive bias. The difference could partly  
471 be explained by the fact that the related laboratory only treats this WWTP and two close  
472 cities, which complicates the automatic recalibration of this laboratory with regard to the  
473 other laboratories as it cannot cover a wide range of the French territory.

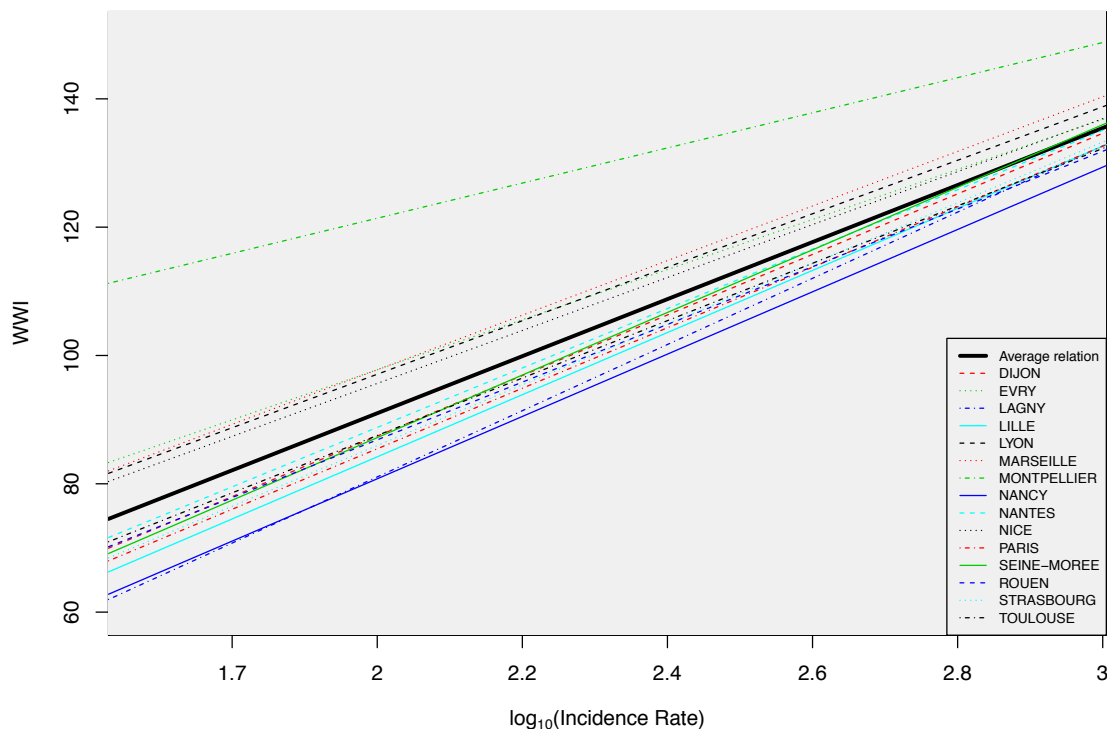

Figure 12: Relation between the WWI and the incidence rate in log scale learned by the full mixed effects model (Model 2). *Montpellier* relation greatly deviates from the average one. The significant deviation in intercept for *Montpellier* is probably due to an insufficient coverage of the French territory by the relative laboratory of this WWTP. The WWTP of *Paris Seine-Amont* was used for the comparison with the *Grand Paris* incidence rate.

474 The results of models comparisons according to the BIC<sup>9</sup> criterion are shown Figure 13.

<sup>9</sup>Bayesian Information Criterion

475 The lower the BIC, the better the performance of the evaluated model. The universal  
476 nature of the WWI is validated for the multiplier coefficient (higher performance of Model  
477 1 compared to Model 2). If, in addition, the *Montpellier-Maera* sewage plant is excluded,  
478 comparative ability is greatly improved (performance of the mixed-effects models and  
479 of the simple linear model are closer), although the difference in performance remains  
480 significant and in favor of the intercept mixed-effect model (Model 1).

481 The (intercept) random effects learned with the selected model (Model 1) after removing  
482 the *Montpellier-Maera* WWTP are shown Figure 14. They correspond to the deviation of  
483 the WWI of the considered WWTPs from the standard relation between the WWIs and the  
484 city incidence rates. A positive (resp. negative) intercept random effect means the WWI  
485 should be lowered (resp. increased) in order to reflect the epidemic state in the same way  
486 that the incidence rate does. The deviations at most shortly exceed 5 units of the WWI: for  
487 *Nancy, Lagny-sur-Marne* (negative intercept effects), *Marseille, Lyon* and *Evry* (positive  
488 intercept effects) which is acceptable, the WWI typically ranging from -50 to 150.

489 Likelihood ratio tests between the nested models show that the comparative ability is im-  
490 proved by each stage of the WWI construction. Indeed, the p-values for the comparison of  
491 the mixed effects model on the intercept (Model 1) with the simple linear model (Model 0)  
492 (after exclusion of the *Montpellier-Maera* WWTP) strongly increases as we move from the  
493 raw data (measurements performed at the WWTP, p-value of  $5.10^{-34}$ ) to the data account-  
494 ing for the inlet volumes and de-noised by the previously described smoother (p-value of  
495  $9.10^{-12}$ ) and to the WWI (p-value of  $4.10^{-6}$ ).

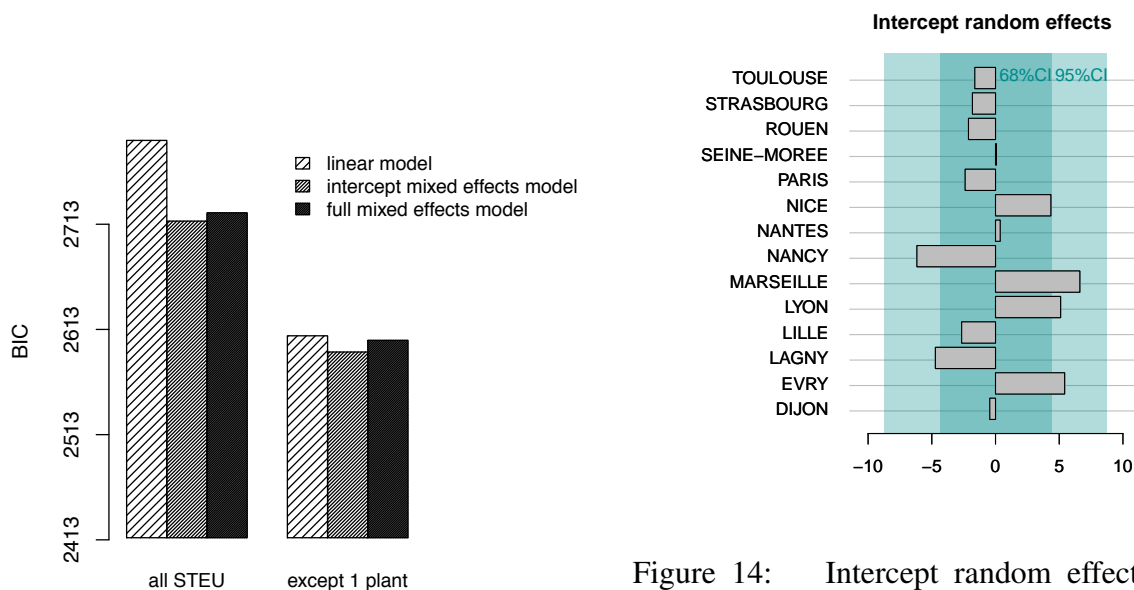

Figure 13: Comparison of Model 2 (full mixed effects model), Model 1 (intercept-only mixed effects model) and Model 0 (simple linear model) according to the Bayesian Information Criterion (BIC) before and after excluding one deviating WWTP (*Montpellier-Maera*). The lower the BIC is, the better the corresponding model is. Model 1 is thus selected while Model 2 is excluded.

Figure 14: Intercept random effects for Model 1 during the second wave of the epidemic for 14 WWTPs. A positive (resp. negative) intercept effect means the WWI should be lowered (resp. increased) in order to reflect the epidemic state in the same way that the incidence rate does. The deviations at most shortly exceed 5 units of the WWI: for *Nancy*, *Lagny-sur-Marne* (negative intercept effect), *Marseille*, *Lyon*, and *Evry* (positive intercept effects) which is acceptable, the WWI typically ranging from -50 to 150. The WWTP of *Paris Seine-Amont* was used for the comparison with the *Grand Paris* incidence rate.

## 4 Discussion

496

497

498

499

500

501

502

503

504

505

506

507

508

509

510

511

512

513

514

515

We have proposed an innovative approach to solve some inherent shortcomings of SARS-CoV-2 analysis in WWTP as a tool to evaluate COVID-19 epidemic. The present algorithm was used in the context of Obepine, a French national surveillance network that is monitoring virus load in 168 WWTPs as of 26th August, 2020. The relevance of WBE<sup>10</sup> as a decision support tool [29, 30] at the highest political level has been concretely demonstrated in this project. This algorithm allows reducing the measurement noise and taking into account the deviations of quantification between different laboratories. It also makes possible to consider the variations of flow at the inlet of the WWTP, among which the effects of dilutions due to rainfalls, regardless of the size of the WWTP. The signal resulting from this modeling is strongly correlated to the incidence signal in exponential regime, which is consistent with the results of [1, 9, 12, 25, 26, 27, 28]. Outside this regime, the correlation may be weaker, probably because the signal captured by the wastewater analyses is not limited to the detection of virus carriers by massive testing campaigns. Indeed, individual testing is most often restricted to symptomatic and contact cases and may not be representative of virus prevalence in people with no or mild symptoms, notably young people, as previously pointed out [15]. It has indeed been reported that asymptomatic patients may test positive for RT-qPCR in stools [16, 17, 18], thus likely to be detected through wastewater analysis. Moreover, some virus carriers tested negative for RT-qPCR in nasopharyngeal or oropharyngeal swabs, meaning that they would not have been in-

---

<sup>10</sup>Wastewater-based epidemiology

516 cluded in the calculation of incidence cases, had they been tested through contact tracing  
517 [16, 17].

518 Based on the data at our disposal, three days sampling seems to be the optimal cost-  
519 performance tradeoff to achieve the same kind of results than with an each day sampling  
520 process. Although results seem already satisfying for twice a week sampling considering  
521 the same criterion and agrees with the conclusions of [21], one could argue that you could  
522 still get quite "unlucky" with some two days combinations, whereas this kind of situation  
523 would not occur with the three days combinations we studied. Thus, if the budget is not  
524 compatible with three days sampling, option 2', corresponding to biweekly sampling with  
525 at least two days without sampling between each sample, might be the best compromise  
526 (see Figure 10). It is still important to underline that, even if we were to sample 1000  
527 WWTPs every day of the week, it would only represent 7000 RT-qPCR analyses a week,  
528 and give a faithful representation of the epidemic. On the other hand, there were, on av-  
529 erage, more than 300 000 tests a week carried out in the single *Île-de-France* region from  
530 13th May, 2020 to 11th June, 2021, according to *Santé Publique France* figures.

531 Qualitative wise, twice-weekly sampling is still satisfactory, but may lead to the failure to  
532 detect some events and affect short-term trends compared to a full week sampling, which  
533 is expected as downgrading the sampling frequency reduces the information collected. A  
534 bias remains in this subsampling study as sampling was not always done every day of the  
535 week at the *Reims* WWTP before November. However, the level of virus circulation did  
536 not vary enough between November 2020 and May 2021 to consider a study starting only

537 from November. In particular, this would not have allowed us to account for the fact of  
538 detecting none, one or more singular points when the virus becomes quantifiable at a time  
539 when the level is generally below the quantification threshold of the analyses (during sum-  
540 mer 2020 in the present study). Moreover, we could not try and replicate this subsampling  
541 experiment on another WWTP. The same study needs to be replicated on several WWTPs  
542 in order to generalize those results with certainty.

543 The results of lag estimation between the wastewater signal and the incidence rate are in the  
544 order of magnitude of a couple days during the exponential phase. Some plants show quite  
545 important lags compared to the others, for example *Nancy* WWTP where the WWI lags by  
546 5 days on average and where the intra-experimental variance is more pronounced than in  
547 the other plants, or *Paris Seine-Morée* where the WWI is 6 days ahead of the incidence rate  
548 signal. Several hypotheses seem plausible to explain these shifts. First, biweekly sampling,  
549 although sufficient to capture the dynamics of the epidemic, may induce an additional  
550 uncertainty of a few days on the actual peak of excretion in wastewater. Furthermore,  
551 the signal captured in wastewaters extends beyond simple reported positive cases. The  
552 propensity of populations to test themselves sometimes differs between agglomerations.  
553 For two metropolitan areas of similar size, such as *Nancy* and *Mulhouse*, the average rate of  
554 testing during the third wave was more than 1.5 times higher in *Nancy*. In municipalities  
555 where people test particularly little or more than the average, the indicator is therefore  
556 more likely to be ahead or to lag behind the incidence by a few days.

557 Finally, the good transposition capacity of the WWI from one WWTP to another, relative to

558 what can be observed on the incidence rate signal, is to be considered. Even though it can  
559 still be worked upon, our study shows a significant improvement to this property thanks to  
560 our smoothing and normalization techniques. It should be noted that the more pronounced  
561 deviations in certain plants can have several interpretations, as can the difference between  
562 the different lags observed. For example, the incidence rate is only available for the whole  
563 of the Aix-Marseille agglomeration, which covers a much larger population than the only  
564 plant we monitor in the network in Marseille. The same applies to regional indicators,  
565 where the difference in correlation between the two regions could be explained by the  
566 deviation in surveyed populations. 28 WWTPs, with a nominal waterflow accounting  
567 for around 58% of the regional population, were followed in the *Grand-Est* region while  
568 7 were studied in the *Île-de-France* region (accounting for around 33% of the regional  
569 population), leading to a less accurate mesh.

570 Despite satisfying results, there is still room for improvement. About the inter-laboratory  
571 variability assessment, nothing would quite match the possibility to assess the different  
572 laboratories on large scale ILA with samples covering a wide range of values in log-  
573 scale. Yet, in view of the urgency of the epidemic situation in France from January 2021  
574 and the need to quickly obtain models to help decision-making at the highest political  
575 level, the project moved into an action research phase. Monitored sewage plants and  
576 analysis laboratories doubled in no less than two months, with analysis reports having to  
577 be processed at least once a week. As such ILA results were not available at that time,  
578 with some laboratories having no prior history between June 2020 and January 2021, the

579 proposed modelisation was considered as our best option. It shows a great improvement  
580 in reducing inter-laboratories variability as shown in Figure 4. Yet, this normalization  
581 is not as effective as scaling from ILA results, notably because it is asymmetrical. The  
582 problem is that it was not possible to set  $C_m$  as a minimum concentration value specific to  
583 each laboratory as the true minimum values are censored by quantification and detection  
584 thresholds specific to each laboratory. Moreover,  $C_m$  was originally designed to be the  
585 specific quantification threshold of each laboratory, so that the 0 level would correspond  
586 to this quantification threshold for each WWTP. However, one of the laboratory joining  
587 late still has a quantification threshold of 40 times the 1000 GU/L limit we are using  
588 for  $C_m$  as of 19th June, 2021. Using a specific  $C_m$  in the normalization step of the WWI  
589 would then have had greatly underestimated the epidemic situation for his related WWTPs.  
590 Finally, SARS-CoV-2 circulation level was high in France when we were asked to start  
591 communicating our results, hence why we chose a normalization technique that would be  
592 more accurate for higher values, yet could still be improved for lower ones.

593 About the regional indicator, we chose not to use a simple average of the WWI to account  
594 for cases where very small WWTP would then have a disproportionate weight in the  
595 regional signal. The downside of it is that it accounts less for geographical diversity. For  
596 example, if two WWTPs are monitored in a region, with one in the north being really  
597 large and one in the south being quite small, the regional WWI will mostly reflect the  
598 northern status. An alternative to cope with this problem without extra cost would have  
599 been to cluster the clinical signals at city level and associate them with the WWI signals



600 they had a strong correlation with in the same region. Then, the weighted average could  
601 have been computed not only with the populations connected to each plant, but with the  
602 sum of the populations of the cities which clinical signals had a strong correlation with  
603 an WWI. Unfortunately, clinical signals not being openly available at a local level, such a  
604 modelisation was not deemed possible.

## 605 **5 Conclusion**

606 The underlying signal in wastewater measurements of SARS-CoV-2 faithfully reflects the  
607 dynamics of the epidemic and has the advantage of being unbiased by test availability,  
608 willingness of populations to be tested, and population movements. In certain periods,  
609 the WWI is also more faithful to the true epidemic situation than the incidence rate,  
610 which is obtained as a rolling week average and is therefore very sensitive to holidays  
611 (uncharacteristic collapse of the epidemic situation at the peak of the third wave of the  
612 pandemic on the incidence rate signal). Moreover, the measurement of this epidemic signal  
613 in wastewater proves to be much less costly than massive individual testing. Indeed, it  
614 allows obtaining a signal strongly correlated to the more usual epidemic indicators by  
615 requiring a single analysis to reflect the average epidemic situation of thousands of people.  
616 Finally, this indicator provides an unbiased survey of the infected population, as it also  
617 accounts for the contribution of asymptomatic infected persons, which is only partially  
618 reflected in the positive test reports, and of unreported infection cases to be recovered. The

619 signal that emerges from these analyses is strongly correlated with the incidence rate and  
620 we consider it to be a credible alternative to the latter as its relevance could decline in a  
621 few months with the advance of the vaccination campaign and therefore a likely reduction  
622 in the quantity of tests carried out to monitor the epidemic.

## 623 **Acknowledgements and funding**

624 This work was carried out within the [Obepine](#) project, funded by the Ministère de l'Enseignement  
625 Supérieur, de la Recherche et de l'Innovation. Financial support was also obtained from  
626 CNRS and Sorbonne Université.

627 We would like to thank *Santé Publique France* for the transmission of specific epidemic  
628 data on the watersheds of three wastewater plants used for this study. We would also like  
629 to thank Jean-Luc Almayrac from SIAAP for helpful discussions. We would also like to  
630 thank Nicolas Benoît from the SACADO unit as well as Sébastien Le Gall and Raphaël  
631 Aparad for the design, development and maintenance of the data collection and storage  
632 platform. We would like to thank the IFREMER for the organization and management of  
633 the various ILA. Finally, we would also like to thank the communities of municipalities  
634 that agreed on joining the network, the operators that greatly made easier the sampling  
635 campaign and all the laboratories that took part in the network.

## References

636

637

[1] Wu, F., Xiao, A., Zhang, J., Moniz, K., Endo, N., Armas, F., Bonneau, R., Brown, M.

638

A., Bushman, M., Chai, P. R., Duvallet, C., Erickson, T. B., Foppe, K., Ghaeli, N.,

639

Gu, X., Hanage, W. P., Huang, K. H., Lee, W. L., Matus, M., ... Alm, E. J., 2020.

640

*SARS-CoV-2 titers in wastewater foreshadow dynamics and clinical presentation of*

641

*new COVID-19 cases.* <https://doi.org/10.1101/2020.06.15.20117747>

642

[2] Bivins, A., Kaya, D., Bibby, K., Simpson, S., Bustin, S., Shanks, O. &

643

Ahmed, W. (2021). Inherent Bias of SARS-CoV-2 RNA Quantification for

644

Wastewater Surveillance Due to Variable RT-qPCR Assay Parameters. MDPI AG.

645

<https://doi.org/10.20944/preprints202106.0320.v1>

646

[3] Kantor, R. S., Nelson, K. L., Greenwald, H. D. & Kennedy, L. C. (2021). Challenges

647

in Measuring the Recovery of SARS-CoV-2 from Wastewater. *Environmental Science*

648

& Technology, 55(6), 3514–3519. <https://doi.org/10.1021/acs.est.0c08210>

649

[4] Courbariaux, M., Cluzel, N., Wang, S., Maréchal, V., Moulin, L., Wurtzer, S., Obépine

650

consortium, Mouchel, J., Maday, Y. & Nuel, G. (2021). An autoregressive model for

651

a censored data denoising method robust to outliers with application to the Obépine

652

SARS-Cov-2 monitoring. <https://arxiv.org/abs/2108.02115>.

653

[5] Nelder, J. A. & Mead, R., 1965. *A simplex method for function minimization.* The

654

computer journal, 7(4), 308-313. <https://doi.org/10.1093/comjnl/7.4.308>

- 655 [6] Rauch, H. E., Tung, F. & Striebel C. T., 1965. *Maximum likelihood estimates of linear*  
656 *dynamic systems*. AIAA Journal, 3(8), 1445–1450. <https://doi.org/10.2514/3.3166>
- 657 [7] Mayne, D. Q., 1966. *A solution of the smoothing problem for linear dynamic systems*.  
658 *Automatica*, 4(2), 73–92. [https://doi.org/10.1016/0005-1098\(66\)90019-7](https://doi.org/10.1016/0005-1098(66)90019-7)
- 659 [8] Fraser, D., & Potter, J., 1969. *The optimum linear smoother as a combination of two*  
660 *optimum linear filters*. IEEE Transactions on Automatic Control, 14(4), 387–390.  
661 <https://doi.org/10.1109/tac.1969.1099196>
- 662 [9] Wurtzer, S., Marechal, V., Mouchel, J., Maday, Y., Teyssou, R., Richard, E., Al-  
663 mayrac, J. & Moulin, L., 2020. *Evaluation of lockdown effect on SARS-CoV-2 dy-*  
664 *namics through viral genome quantification in waste water, Greater Paris, France,*  
665 *5 March to 23 April 2020*. Eurosurveillance, 25(50) [https://doi.org/10.2807/1560-](https://doi.org/10.2807/1560-7917.es.2020.25.50.2000776)  
666 [7917.es.2020.25.50.2000776](https://doi.org/10.2807/1560-7917.es.2020.25.50.2000776)
- 667 [10] Bertrand, I., Challant, J., Jeulin, H., Hartard, C., Mathieu, L., Lopez, S., Schvo-  
668 erer, E., Courtois, S. & Gantzer, C., 2021. *Epidemiological surveillance of SARS-*  
669 *CoV-2 by genome quantification in wastewater applied to a city in the northeast*  
670 *of France: Comparison of ultrafiltration- and protein precipitation-based meth-*  
671 *ods*. International Journal of Hygiene and Environmental Health, 233, 113692.  
672 <https://doi.org/10.1016/j.ijheh.2021.113692>
- 673 [11] Kocamemi, B. A., Kurt, H., Hacıoglu, S., Yaralı, C., Saatci, A. M. & Pakdemirli, B.,  
674 2020. *First Data-Set on SARS-CoV-2 Detection for Istanbul Wastewaters in Turkey*.

675 <https://doi.org/10.1101/2020.05.03.20089417>

676 [12] Hata, A., Hara-Yamamura, H., Meuchi, Y., Imai, S. & Honda, R. (2021). Detection  
677 of SARS-CoV-2 in wastewater in Japan during a COVID-19 outbreak. *Science of The*  
678 *Total Environment*, 758, 143578. <https://doi.org/10.1016/j.scitotenv.2020.143578>

679 [13] Gandhi, M., Yokoe, D. S. & Havlir, D. V. (2020). Asymptomatic Transmission, the  
680 Achilles' Heel of Current Strategies to Control Covid-19. *New England Journal of*  
681 *Medicine*, 382(22), 2158–2160. <https://doi.org/10.1056/nejme2009758>

682 [14] Mizumoto, K., Kagaya, K., Zarebski, A. & Chowell, G. (2020). Estimating the  
683 asymptomatic proportion of coronavirus disease 2019 (COVID-19) cases on board  
684 the Diamond Princess cruise ship, Yokohama, Japan, 2020. *Eurosurveillance*, 25(10).  
685 <https://doi.org/10.2807/1560-7917.es.2020.25.10.2000180>

686 [15] Weidhaas, J., Aanderud, Z. T., Roper, D. K., VanDerslice, J., Gaddis, E. B., Oster-  
687 miller, J., Hoffman, K., Jamal, R., Heck, P., Zhang, Y., Torgersen, K., Laan, J. V.  
688 & LaCross, N., 2021. *Correlation of SARS-CoV-2 RNA in wastewater with COVID-*  
689 *19 disease burden in sewersheds*. *Science of The Total Environment*, 775, 145790.  
690 <https://doi.org/10.1016/j.scitotenv.2021.145790>

691 [16] Jiang, X., Luo, M., Zou, Z., Wang, X., Chen, C. & Qiu, J., 2020. *Asymptomatic SARS-*  
692 *CoV-2 infected case with viral detection positive in stool but negative in nasopharyn-*  
693 *geal samples lasts for 42 days*. *Journal of Medical Virology*, 92(10), 1807–1809.  
694 <https://doi.org/10.1002/jmv.25941>

- 695 [17] Tang, A., Tong, Z., Wang, H., Dai, Y., Li, K., Liu, J., Wu, W., Yuan, C., Yu, M.,  
696 Li, P. & Yan, J., 2020. *Detection of Novel Coronavirus by RT-PCR in Stool Specimen*  
697 *from Asymptomatic Child, China*. Emerging Infectious Diseases, 26(6), 1337–1339.  
698 <https://doi.org/10.3201/eid2606.200301>
- 699 [18] Park, S., Lee, C.-W., Park, D.-I., Woo, H.-Y., Cheong, H. S., Shin, H. C., Ahn, K.,  
700 Kwon, M.-J. & Joo, E.-J., 2020. *Detection of SARS-CoV-2 in Fecal Samples From*  
701 *Patients With Asymptomatic and Mild COVID-19 in Korea*. Clinical Gastroenterology  
702 and Hepatology. <https://doi.org/10.1016/j.cgh.2020.06.005>
- 703 [19] Xiao, A., Wu, F., Bushman, M., Zhang, J., Imakaev, M., Chai, P. R., Duvallet, C.,  
704 Endo, N., Erickson, T. B., Armas, F., Arnold, B., Chen, H., Chandra, F., Ghaeli,  
705 N., Gu, X., Hanage, W. P., Lee, W. L., Matus, M., McElroy, K. A., ... Alm, E. J.  
706 (2021). Metrics to relate COVID-19 wastewater data to clinical testing dynamics.  
707 <https://doi.org/10.1101/2021.06.10.21258580>
- 708 [20] Fernandez-Cassi, X., Scheidegger, A., Bänziger, C., Cariti, F., Corzon, A.  
709 T., Ganesanandamoorthy, P., Lemaitre, J. C., Ort, C., Julian, T. R. &  
710 Kohn, T. (2021). Wastewater monitoring outperforms case numbers as a tool  
711 to track COVID-19 incidence dynamics when test positivity rates are high.  
712 <https://doi.org/10.1101/2021.03.25.21254344>
- 713 [21] Feng, S., Roguet, A., McClary-Gutierrez, J. S., Newton, R. J., Kloczko, N., Meiman,  
714 J. G. & McLellan, S. L. (2021). Evaluation of sampling frequency and normalization

715 of SARS-CoV-2 wastewater concentrations for capturing COVID-19 burdens in the  
716 community. <https://doi.org/10.1101/2021.02.17.21251867>

717 [22] Ahmed, W., Tscharke, B., Bertsch, P. M., Bibby, K., Bivins, A., Choi, P., Clarke,  
718 L., Dwyer, J., Edson, J., Nguyen, T. M. H., O'Brien, J. W., Simpson, S. L., Sherman,  
719 P., Thomas, K. V., Verhagen, R., Zaugg, J. & Mueller, J. F. (2021). SARS-CoV-  
720 2 RNA monitoring in wastewater as a potential early warning system for COVID-  
721 19 transmission in the community: A temporal case study. *Science of The Total*  
722 *Environment*, 761, 144216. <https://doi.org/10.1016/j.scitotenv.2020.144216>

723 [23] Saguti, F., Magnil, E., Enache, L., Churqui, M. P., Johansson, A., Lumley, D., Davids-  
724 son, F., Dotevall, L., Mattsson, A., Trybala, E., Lagging, M., Lindh, M., Gisslén, M.,  
725 Brezicka, T., Nyström, K. & Norder, H. (2021). Surveillance of wastewater revealed  
726 peaks of SARS-CoV-2 preceding those of hospitalized patients with COVID-19. *Water*  
727 *Research*, 189, 116620. <https://doi.org/10.1016/j.watres.2020.116620>

728 [24] D'Aoust, P. M., Graber, T. E., Mercier, E., Montpetit, D., Alexandrov, I., Neault, N.,  
729 Baig, A. T., Mayne, J., Zhang, X., Alain, T., Servos, M. R., Srikanthan, N., MacKen-  
730 zie, M., Figeys, D., Manuel, D., Jüni, P., MacKenzie, A. E. & Delatolla, R. (2021).  
731 Catching a resurgence: Increase in SARS-CoV-2 viral RNA identified in wastewater  
732 48 h before COVID-19 clinical tests and 96 h before hospitalizations. *Science of The*  
733 *Total Environment*, 770, 145319. <https://doi.org/10.1016/j.scitotenv.2021.145319>

734 [25] D'Aoust, P. M., Mercier, E., Montpetit, D., Jia, J.-J., Alexandrov, I., Neault, N.,

- 735 Baig, A. T., Mayne, J., Zhang, X., Alain, T., Langlois, M.-A., Servos, M. R.,  
736 MacKenzie, M., Figeys, D., MacKenzie, A. E., Graber, T. E. & Delatolla, R. (2021).  
737 Quantitative analysis of SARS-CoV-2 RNA from wastewater solids in communi-  
738 ties with low COVID-19 incidence and prevalence. *Water Research*, 188, 116560.  
739 <https://doi.org/10.1016/j.watres.2020.116560>
- 740 [26] Medema, G., Heijnen, L., Elsinga, G., Italiaander, R. & Brouwer, A. (2020).  
741 Presence of SARS-Coronavirus-2 RNA in Sewage and Correlation with Re-  
742 ported COVID-19 Prevalence in the Early Stage of the Epidemic in The  
743 Netherlands. *Environmental Science & Technology Letters*, 7(7), 511–516.  
744 <https://doi.org/10.1021/acs.estlett.0c00357>
- 745 [27] Ahmed, W., Angel, N., Edson, J., Bibby, K., Bivins, A., O'Brien, J. W., Choi, P.  
746 M., Kitajima, M., Simpson, S. L., Li, J., Tschärke, B., Verhagen, R., Smith, W. J. M.,  
747 Zaugg, J., Dierens, L., Hugenholtz, P., Thomas, K. V. & Mueller, J. F. (2020). First  
748 confirmed detection of SARS-CoV-2 in untreated wastewater in Australia: A proof of  
749 concept for the wastewater surveillance of COVID-19 in the community. *Science of*  
750 *The Total Environment*, 728, 138764. <https://doi.org/10.1016/j.scitotenv.2020.138764>
- 751 [28] Peccia, J., Zulli, A., Brackney, D. E., Grubaugh, N. D., Kaplan, E. H., Casanovas-  
752 Massana, A., Ko, A. I., Malik, A. A., Wang, D., Wang, M., Warren, J. L., Wein-  
753 berger, D. M., Arnold, W. & Omer, S. B. (2020). Measurement of SARS-CoV-2 RNA  
754 in wastewater tracks community infection dynamics. *Nature Biotechnology*, 38(10),  
755 1164–1167. <https://doi.org/10.1038/s41587-020-0684-z>



- 756 [29] Prado, T., Fumian, T. M., Mannarino, C. F., Resende, P. C., Motta, F. C., Eppinghaus,  
757 A. L. F., Chagas do Vale, V. H., Braz, R. M. S., de Andrade, J. da S. R., Maranhão,  
758 A. G. & Miagostovich, M. P. (2021). Wastewater-based epidemiology as a useful tool  
759 to track SARS-CoV-2 and support public health policies at municipal level in Brazil.  
760 Water Research, 191, 116810. <https://doi.org/10.1016/j.watres.2021.116810>
- 761 [30] Baldovin, T., Amoruso, I., Fonzo, M., Buja, A., Baldo, V., Cocchio, S. &  
762 Bertoncello, C. (2021). SARS-CoV-2 RNA detection and persistence in wastewa-  
763 ter samples: An experimental network for COVID-19 environmental surveillance in  
764 Padua, Veneto Region (NE Italy). Science of The Total Environment, 760, 143329.  
765 <https://doi.org/10.1016/j.scitotenv.2020.143329>
